# Supplementary material for: β-Cyclodextrin as a recyclable catalyst: aqueous phase one-pot four-component synthesis of polyfunctionalized pyrroles
Source: Royal Society of Chemistry journal article supplement (doi:10.1039/c6ra08335h), 2016-01-01

## **Supporting Information**

### **β-Cyclodextrin as a recyclable catalyst: Aqueous phase one-pot four-component synthesis of polyfunctionalized pyrroles.**

**Karnakar Konkala,<sup>a</sup> Rakhi Chowrasia,<sup>b</sup> Padma S. Manjari,<sup>b\*</sup> Nelson L. C Domingues,<sup>c\*</sup> and Ramesh Katla.<sup>c\*</sup>**

*<sup>a</sup>MCP-Division, Indian Institute of Chemical Technology (IICT) Hyderabad-500 607, India.*

*<sup>b</sup>Department of Chemistry, Osmania University, Hyderabad, India-500004. <sup>c</sup>Organic Catalysis and Biocatalysis Laboratory OCBL/ FACET, Federal University of Grande Dourados—UFGD, Dourados/Itahúm rod. km 12 s/n, Zip Code 79804-970, Dourados, MS, Brazil. E-mail: [psmanjari76@gmail.com](mailto:psmanjari76@gmail.com); [nelsondomingues@ufgd.edu.br](mailto:nelsondomingues@ufgd.edu.br); [rameshkchem@gmail.com](mailto:rameshkchem@gmail.com).*

## **Contents**

|                                                                                      |              |
|--------------------------------------------------------------------------------------|--------------|
| <b>General Information.....</b>                                                      | <b>2</b>     |
| <b>General procedure for the synthesis of polyfunctionalized pyrroles....</b>        |              |
| <b>.....</b>                                                                         | <b>2</b>     |
| <b>Spectroscopic Data.....</b>                                                       | <b>3-17</b>  |
| <b>Copies of <sup>1</sup>H NMR and <sup>13</sup>C NMR spectra of compounds .....</b> | <b>18-43</b> |

## **General Information:**

All chemical were purchased from Sigma Aldrich with purity not less than 99.9%. Analytical Thin Layer Chromatography (TLC) was carried out by using silica gel 60 F<sub>254</sub> pre-coated plates. Visualization was accomplished with UV lamp of I<sub>2</sub> stain. All products were characterized by their NMR and Mass spectra. <sup>1</sup>H NMR and <sup>13</sup>C NMR recorded on 300 or 400 MHz, in CDCl<sub>3</sub> using TMS as the internal standard, chemical shifts were reported in parts per million (ppm, δ) downfield from the tetramethylsilane.

## **General procedure for the synthesis of polyfunctionalized pyrroles:**

β-Cyclodextrin (1.0 mmol, 1.135g) was dissolved in water (15 mL) at 70 °C and to this clear solution, aldehyde (1.0 mmol), nitromethane (1.0 mL) followed by aromatic amine (1.5 mmol) and acetyl acetone (1.0 mmol) after which the reaction mixture was heated at 70-80°C until completion of the reaction as indicated by TLC. The reaction mixture was cooled to the room temperature and β-CD was filtered, the aqueous phase was extracted with ethyl acetate (3×10 mL). The organic layers were washed with water, saturated brine solution and dried over anhydrous NaSO<sub>4</sub>. The combined organic layers were evaporated under reduced pressure and the resulting crude product was purified by column chromatography by using ethyl acetate and hexane (1:9) as eluent to give corresponding polyfunctionalized pyrrole

## Spectroscopic Data:

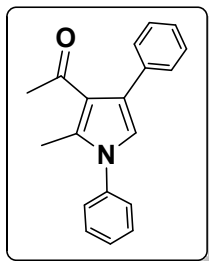

**1-(2-methyl-1,4-diphenyl-1H-pyrrol-3-yl) ethanone (Table 2, Entry 1):** Light brown solid, mp 106-109 °C. IR (KBr) 3060, 2923, 1642, 1495, 1400, 1226 cm<sup>-1</sup>; <sup>1</sup>H NMR (300MHz, CDCl<sub>3</sub>, TMS) δ=7.30-7.34 (m, 3H), 7.37-7.50 (m, 7H), 6.67 (s, 1H), 2.41 (s, 3H), 2.07(s, 3H) ppm; <sup>13</sup>C NMR (75MHz, CDCl<sub>3</sub>, TMS) δ 12.8, 30.9, 114.5, 120.5, 122.4, 126.1, 126.3, 126.7, 128.0, 128.1, 128.8, 129.2, 135.2, 135.9, 138.6, 197.5 ppm. HRMS: *m/z* calcd for C<sub>19</sub>H<sub>17</sub>NONa 298.1207; found 298.1200.

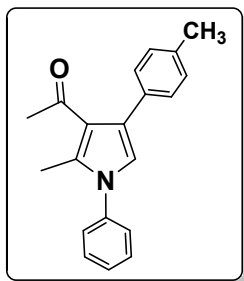

**1-(2-methyl-1-phenyl-4-p-tolyl-1H-pyrrol-3-yl) ethanone (Table 2, Entry 2):** Brown oil. IR (KBr) 3022, 2924, 1644, 1495, 1410, 1224 cm<sup>-1</sup>; <sup>1</sup>H NMR (300MHz, CDCl<sub>3</sub>, TMS) δ= 7.41-7.50 (m, 3H), 7.32 (d, *J* = 7.7 Hz, 2H), 7.24-7.26 (m, 2H), 7.18 (d, *J* = 7.7 Hz, 2H), 6.63 (s, 1H), 2.38 (s, 6H), 2.07(s, 3H) ppm; <sup>13</sup>C NMR (75MHz, CDCl<sub>3</sub>, TMS) δ 12.9, 29.7, 31.1, 110.8, 120.6, 122.4, 125.0, 126.2, 128.2, 128.4, 129.3, 130.4, 132.8, 134.5, 135.5, 138.6, 196.9 ppm. HRMS: *m/z* calcd for C<sub>20</sub>H<sub>20</sub>NO (M+1) 290.1544; found 290.1548.

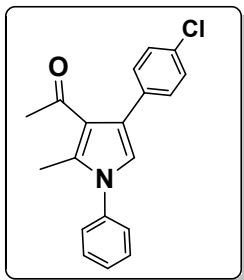

**1-(4-(4-chlorophenyl)-2-methyl-1-phenyl-1H-pyrrol-3-yl)ethanone (Table 2, Entry 3)**  
: White solid, mp 119-124°C. IR (KBr) 2922, 2854, 1652, 1499, 1408, 1221 cm<sup>-1</sup>; <sup>1</sup>H

NMR (300MHz, CDCl<sub>3</sub>, TMS)  $\delta$ = 7.42-7.51 (m, 3H), 7.28-7.36 (m, 6H), 6.64 (s, 1H), 2.39 (s, 3H), 2.08 (s, 3H) ppm; <sup>13</sup>C NMR (75MHz CDCl<sub>3</sub>, TMS)  $\delta$  12.9, 29.6, 113.2, 120.6, 122.5, 125.0, 126.2, 128.2, 128.4, 129.4, 130.4, 135.5, 197.0 ppm. HRMS:  $m/z$  calcd for C<sub>19</sub>H<sub>16</sub>ClNNaO 332.0818; found 332.0813.

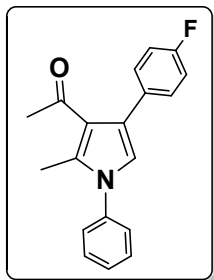

**1-(4-(4-fluorophenyl)-2-methyl-1-phenyl-1H-pyrrol-3-yl)ethanone (Table 2, Entry 4)**: Light yellow oil. IR (KBr) 3052, 2922, 1651, 1509, 1408, 1220 cm<sup>-1</sup>; <sup>1</sup>H NMR (300MHz, CDCl<sub>3</sub>, TMS)  $\delta$ = 7.42-7.51 (m, 3H), 7.31-7.36 (m, 4H), 7.04-7.12 (m, 2H), 6.64 (s, 1H), 2.40 (s, 3H), 2.07 (s, 3H) ppm; <sup>13</sup>C NMR (75MHz CDCl<sub>3</sub>, TMS)  $\delta$  12.8, 29.4, 111.0, 120.4, 122.4, 125.2, 125.9, 128.0, 128.3, 129.2, 130.3, 135.0, 196.6 ppm. ESI-MS: 294 (M+H)<sup>+</sup>.

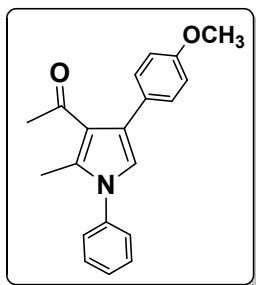

**1-(4-(4-methoxyphenyl)-2-methyl-1-phenyl-1H-pyrrol-3-yl)ethanone (Table 2, Entry 5)**: Brown oil. IR (KBr) 2924, 2852, 1649, 1503, 1411, 1232 cm<sup>-1</sup>; <sup>1</sup>H NMR (300MHz, CDCl<sub>3</sub>, TMS)  $\delta$ = 7.39-7.49 (m 3H), 7.32 (d,  $J$  = 7.1 Hz, 2H), 7.25 (d,  $J$  = 8.5 Hz, 2H), 6.88 (d,  $J$  = 8.5 Hz, 2H), 6.59 (s, 1H), 3.83 (s, 3H), 2.39 (s, 3H), 2.04 (s, 3H) ppm; <sup>13</sup>C NMR (75MHz, CDCl<sub>3</sub>, TMS)  $\delta$  13.0, 31.0, 55.0, 113.6, 120.2, 126.2, 127.9, 128.3, 129.2, 129.7, 130.3, 135.3, 196.6 ppm. HRMS:  $m/z$  calcd for C<sub>20</sub>H<sub>19</sub>NNaO<sub>2</sub> 328.1313; found 328.1310.

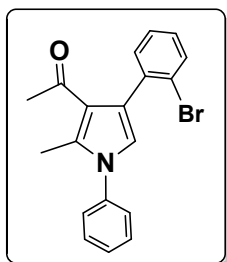

**1-(4-(2-bromophenyl)-2-methyl-1-phenyl-1H-pyrrol-3-yl)ethanone (Table 2, Entry 6)** : Dark brown oil. IR (KBr) 3117, 2922, 1647, 1502, 1404, 1226  $\text{cm}^{-1}$ ;  $^1\text{H}$  NMR (300MHz,  $\text{CDCl}_3$ , TMS)  $\delta$ = 7.64 (d,  $J$  = 8.3 Hz, 1H), 7.47 (q,  $J$  = 7.5 Hz, 3H), 7.35 (t,  $J$  = 7.5 Hz, 4H), 7.20 (d,  $J$  = 7.5 Hz), 6.63 (s, 1H), 2.46 (s, 3H), 1.98 (s, 3H) ppm;  $^{13}\text{C}$  NMR (75MHz,  $\text{CDCl}_3$ , TMS)  $\delta$  13.1, 30.1, 112.2, 121.0, 124.5, 125.1, 126.1, 127.1, 128.0, 128.7, 129.2, 131.9, 132.6, 135.3, 137.3, 138.4, 196.3 ppm. HRMS:  $m/z$  calcd for  $\text{C}_{19}\text{H}_{17}\text{BrNO}$  (M+1) 354.0493; found 354.0488.

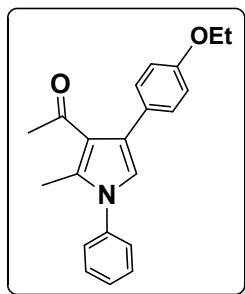

**1-(4-(4-ethoxyphenyl)-2-methyl-1-phenyl-1H-pyrrol-3-yl)ethanone (Table 2, Entry 7)** : Brown oil. IR (KBr) 2926, 2852, 1648, 1502, 1403, 1244  $\text{cm}^{-1}$ ;  $^1\text{H}$  NMR (300MHz,  $\text{CDCl}_3$ , TMS)  $\delta$ = 7.50-7.43 (m, 3H), 7.25-7.33 (m, 4H), 6.89 (d,  $J$  = 8.5 Hz, 2H), 6.61 (s, 1H), 4.05 (q,  $J$  = 6.9 Hz, 2H), 2.40(s, 3H), 2.06 (s, 3H), 1.44 (t,  $J$  = 6.9 Hz, 3H) ppm;  $^{13}\text{C}$  NMR (75MHz,  $\text{CDCl}_3$ , TMS)  $\delta$  12.9, 14.8, 31.1, 63.3, 114.2, 120.3, 125.9, 126.2, 127.9, 129.2, 130.3, 136.5, 197.5 ppm. HRMS:  $m/z$  calcd for  $\text{C}_{21}\text{H}_{21}\text{NNaO}_2$  342.1469; found 342.1460.

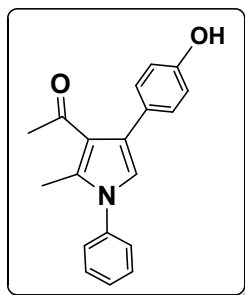

**1-(4-(4-hydroxyphenyl)-2-methyl-1-phenyl-1H-pyrrol-3-yl)ethanone (Table 2, Entry 8)** : Dark brown oil. IR (KBr) 3421, 2925, 1642, 1500, 1400, 1228  $\text{cm}^{-1}$ ;  $^1\text{H}$  NMR (300MHz,  $\text{CDCl}_3$ , TMS)  $\delta$ = 7.44-7.51 (m, 3H), 7.31 (d,  $J$  = 8.3 Hz, 2H), 7.21 (d,  $J$  = 8.3 Hz, 2H), 6.90 (d,  $J$  = 8.3 Hz, 2H), 6.62 (s, 1H), 2.41 (s, 3H), 2.10 (s, 3H) ppm;  $^{13}\text{C}$  NMR (75MHz,  $\text{CDCl}_3$ , TMS)  $\delta$  13.0, 30.8, 115.3, 118.9, 120.5, 122.3, 126.1, 128.0, 129.2, 130.4, 135.6, 138.5, 155.4, 198.6 ppm. HRMS:  $m/z$  calcd for  $\text{C}_{19}\text{H}_{17}\text{NNaO}_2$  314.1156; found 314.1157.

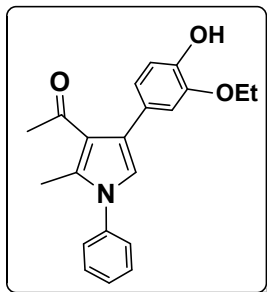

**1-(4-(3-ethoxy-4-hydroxyphenyl)-2-methyl-1-phenyl-1H-pyrrol-3-yl)ethanone (Table 2, Entry 9)** : Brown oil. IR (KBr) 3420, 2928, 1644, 1502, 1410, 1225  $\text{cm}^{-1}$ ;  $^1\text{H}$  NMR (300MHz,  $\text{CDCl}_3$ , TMS)  $\delta$ = 7.42-7.51 (m, 3H), 7.32 (d,  $J$  = 7.3 Hz, 2H), 6.94 (d,  $J$  = 8.3 Hz, 1H), 6.87 (d,  $J$  = 7.3 Hz, 2H), 6.64 (s, 1H), 4.12 (q,  $J$  = 6.7 Hz, 2H), 2.40 (s, 3H), 2.11 (s, 3H), 1.45 (t,  $J$  = 6.7 Hz, 3H) ppm;  $^{13}\text{C}$  NMR (75MHz,  $\text{CDCl}_3$ , TMS)  $\delta$  13.0, 14.9, 30.9, 64.5, 113.0, 114.2, 120.5, 122.1, 122.5, 126.2, 127.9, 128.1, 129.3, 138.7, 144.9, 145.5, 199.7 ppm. HRMS:  $m/z$  calcd for  $\text{C}_{21}\text{H}_{21}\text{NNaO}_3$  358.1419; found 358.1430.

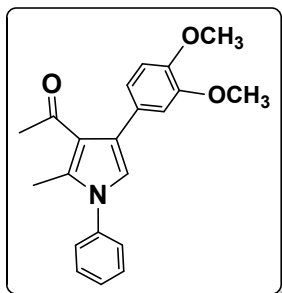

**1-(4-(3, 4-dimethoxyphenyl)-2-methyl-1-phenyl-1H-pyrrol-3-yl) ethanone (Table 2, Entry 10)**: Reddish brown oil. IR (KBr) 2924, 2852, 1649, 1503, 1411, 1232  $\text{cm}^{-1}$ ;  $^1\text{H}$  NMR (300MHz,  $\text{CDCl}_3$ , TMS)  $\delta$ = 7.44-7.49 (m, 2H), 7.32 (d,  $J$  = 8.3 Hz, 2H), 7.26 (s, 1H), 6.88-6.90 (m, 3H), 6.65 (s, 1H), 3.91 (s, 3H), 3.89 (s, 3H), 2.41 (s, 3H), 2.10 (s, 3H) ppm;  $^{13}\text{C}$  NMR (75MHz,  $\text{CDCl}_3$ , TMS)  $\delta$  12.9, 29.7, 55.8, 111.0, 112.7, 120.4, 121.5, 126.2, 128.0, 128.6, 129.3, 138.7, 148.1, 148.6, 198.5 ppm. ESI-MS: 336 (M+H) $^+$ .

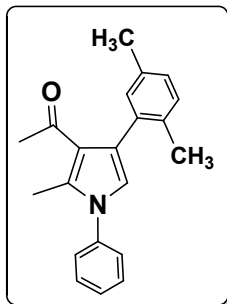

**1-(4-(2, 5-dimethylphenyl)-2-methyl-1-phenyl-1H-pyrrol-3-yl) ethanone (Table 2, Entry 11)**: Brown oil. IR (KBr) 2923, 2853, 1653, 1499, 1408, 1222  $\text{cm}^{-1}$ ;  $^1\text{H}$  NMR (300MHz,  $\text{CDCl}_3$ , TMS)  $\delta$ = 7.41-7.51 (m, 3H), 7.33 (d,  $J$  = 8.3 Hz, 2H), 7.07-7.15 (m,

3H), 6.55 (s, 1H), 2.46 (s, 3H), 2.33 (s, 3H), 2.20 (s, 3H), 1.90 (s, 3H) ppm;  $^{13}\text{C}$  NMR (75MHz  $\text{CDCl}_3$ , TMS)  $\delta$  13.2, 19.9, 20.8, 30.1, 110.8, 120.3, 126.1, 127.9, 128.0, 128.9, 129.2, 129.7, 131.3, 133.9, 134.9, 135.7, 138.7, 197.0 ppm. HRMS:  $m/z$  calcd for  $\text{C}_{21}\text{H}_{21}\text{NNaO}$  326.1518; found 326.1510.

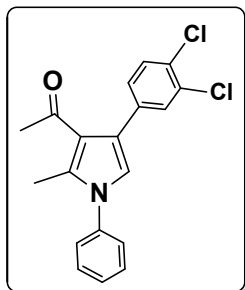

**1-(4-(3, 4-dichlorophenyl)-2-methyl-1-phenyl-1H-pyrrol-3-yl) ethanone (Table 2, Entry 12):** White solid, mp120-125°C. IR (KBr) 2922, 2853, 1652, 1499, 1408, 1222  $\text{cm}^{-1}$ ;  $^1\text{H}$  NMR (300MHz,  $\text{CDCl}_3$ , TMS)  $\delta$ = 7.42-7.55 (m, 5H), 7.31 (d,  $J$  = 6.9 Hz, 2H), 7.20 (d,  $J$  = 8.1 Hz, 1H), 6.67 (s, 1H), 2.39 (s, 3H), 2.13 (s, 3H) ppm;  $^{13}\text{C}$  NMR (75MHz,  $\text{CDCl}_3$ , TMS)  $\delta$  12.8, 29.6, 114.0, 120.9, 122.2, 126.1, 128.3, 128.5, 129.3, 130.0, 130.7, 132.1, 135.7, 136.0, 138.3, 196.7 ppm. ESI-MS: 344 (M+H) $^+$ .

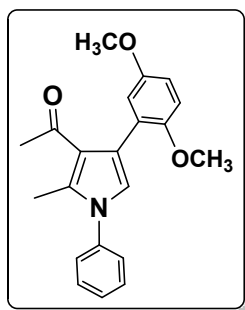

**1-(4-(2, 5-dimethoxyphenyl)-2-methyl-1-phenyl-1H-pyrrol-3-yl) ethanone (Table 2, Entry 13):** Dark brown oil. IR (KBr) 2924, 2852, 1651, 1503, 1411, 1232  $\text{cm}^{-1}$ ;  $^1\text{H}$  NMR (300MHz,  $\text{CDCl}_3$ , TMS)  $\delta$ = 7.45-7.49 (m, 2H), 7.40 (d,  $J$  = 6.7 Hz, 1H), 7.33 (d,  $J$  = 6.7 Hz, 2H), 6.91 (s, 1H), 6.84(s, 2H), 6.67 (s, 1H), 3.79 (s, 3H), 3.75 (s, 3H), 2.41 (s, 3H), 2.07 (s, 3H) ppm;  $^{13}\text{C}$  NMR (75MHz,  $\text{CDCl}_3$ , TMS)  $\delta$  12.8, 29.6, 55.6, 111.3, 112.6, 116.7, 120.8, 122.9, 126.1, 127.8, 129.1, 134.5, 138.7, 150.9, 153.4, 197.5 ppm. ESI-MS: 336 (M+H) $^+$ .

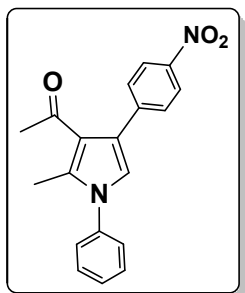

**1-(2-methyl-4-(4-nitrophenyl)-1-phenyl-1H-pyrrol-3-yl) ethanone (Table 2, Entry 14):** Brown oil. IR (KBr) 2922, 2853, 1649, 1503, 1410, 1222  $\text{cm}^{-1}$ ;  $^1\text{H}$  NMR (300MHz,  $\text{CDCl}_3$ , TMS)  $\delta$ = 8.24(d,  $J$  = 8.3 Hz, 2H), 7.49-7.55 (m, 4H), 7.32-7.35 (m, 2H), 7.26 (s, 1H), 6.78 (s, 1H), 2.40 (s, 3H), 2.18 (s, 3H) ppm;  $^{13}\text{C}$  NMR (75MHz,  $\text{CDCl}_3$ , TMS)  $\delta$  12.8, 31.2, 112.0, 121.6, 122.7, 123.6, 124.1, 126.2, 126.8, 127.8, 128.5, 129.4, 143.9, 145.2, 198.4 ppm. HRMS:  $m/z$  calcd for  $\text{C}_{19}\text{H}_{17}\text{N}_2\text{O}_3$  (M+1) 321.1239; found 321.1225.

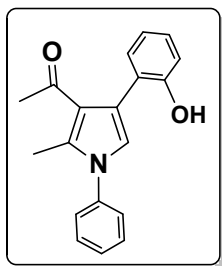

**1-(4-(2-hydroxyphenyl)-2-methyl-1-phenyl-1H-pyrrol-3-yl)ethanone (Table 2, Entry 15) :** Dark brown oil. IR (KBr) 3441, 2922, 1644, 1501, 1408, 1222  $\text{cm}^{-1}$ ;  $^1\text{H}$  NMR (300MHz,  $\text{CDCl}_3$ , TMS)  $\delta$ = 7.42-7.50 (m, 3H), 7.30 (d,  $J$  = 8.3 Hz, 2H), 7.23 (d,  $J$  = 8.3 Hz, 2H), 6.92 (d,  $J$  = 8.3 Hz, 2H), 6.60 (s, 1H), 2.41 (s, 3H), 2.08 (s, 3H) ppm;  $^{13}\text{C}$  NMR (75MHz,  $\text{CDCl}_3$ , TMS)  $\delta$  12.8, 31.2, 115.0, 118.6, 121.0, 122.6, 127.1, 128.0, 129.6, 131.4, 135.8, 139.0, 156.4, 197.6 ppm. HRMS:  $m/z$  calcd for  $\text{C}_{19}\text{H}_{17}\text{NNaO}_2$  314.1156; found 314.1157.

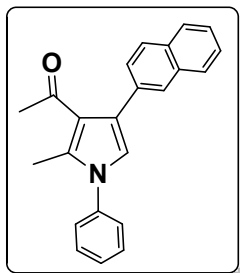

**1-(2-methyl-4-(naphthalen-2-yl)-1-phenyl-1H-pyrrol-3-yl) ethanone (Table 2, Entry 16):** Light yellow liquid. IR (KBr) 3060, 2923, 1642, 1495, 1400, 1226  $\text{cm}^{-1}$ ;  $^1\text{H}$  NMR (300MHz,  $\text{CDCl}_3$ , TMS)  $\delta$ = 7.82-7.87 (m, 5H), 7.43-7.52 (m, 5H), 7.36 (d,  $J$  = 6.9 Hz, 2H), 6.77 (s, 1H), 2.43 (s, 3H), 2.09 (s, 3H) ppm;  $^{13}\text{C}$  NMR (75MHz,  $\text{CDCl}_3$ , TMS)  $\delta$  12.9, 29.6, 110.6, 120.9, 122.6, 125.7, 126.2, 127.3, 127.6, 127.7, 128.0, 128.1, 129.3, 132.2, 133.4, 135.4, 138.6, 197.7 ppm. ESI-MS: 326 (M+H) $^+$ .



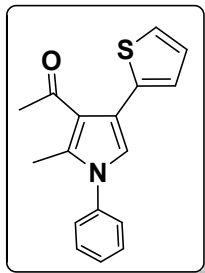

**1-(2-methyl-1-phenyl-4-(thiophen-2-yl)-1H-pyrrol-3-yl) ethanone (Table 2, Entry 17):** Brown solid, mp 137-142°C. IR (KBr) 2922, 2852, 1636, 1497, 1380, 1232 cm<sup>-1</sup>; <sup>1</sup>H NMR (300MHz, CDCl<sub>3</sub>, TMS) δ= 7.42-7.51 (m, 3H), 7.25-7.33 (m, 3H), 6.99-7.06 (m, 2H), 6.74 (s, 1H), 2.40 (s, 3H), 2.17 (s, 3H) ppm; <sup>13</sup>C NMR (75MHz CDCl<sub>3</sub>, TMS) δ 13.0, 29.7, 111.2, 121.9, 122.6, 125.0, 126.2, 127.0, 127.2, 128.2, 129.4, 135.6, 196.7 ppm. ESI-MS: 282 (M+H)<sup>+</sup>.

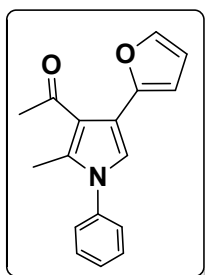

**1-(4-(furan-2-yl)-2-methyl-1-phenyl-1H-pyrrol-3-yl)ethanone (Table 2, Entry 18):** Brown solid, mp 107-110°C. IR (KBr) 2924, 2850, 1644, 1495, 1444, 1222 cm<sup>-1</sup>; <sup>1</sup>H NMR (300MHz, CDCl<sub>3</sub>, TMS) δ= 7.54-7.60 (m, 3H), 7.22-7.31 (m, 3H), 6.95-7.04 (m, 2H), 6.68 (s, 1H), 2.40 (s, 3H), 2.10 (s, 3H) ppm; <sup>13</sup>C NMR (75MHz CDCl<sub>3</sub>, TMS) δ 12.8, 29.6, 110.8, 121.7, 122.6, 126.2, 127.2, 128.2, 129.4, 135.6, 141.9, 154.3, 196.7 ppm. ESI-MS: 266 (M+H)<sup>+</sup>.

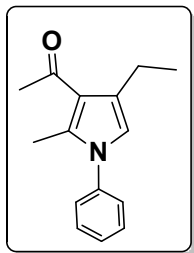

**1-(4-ethyl-2-methyl-1-phenyl-1H-pyrrol-3-yl)ethanone (Table 2, Entry 19):** Brown oil. IR (KBr) 2922, 2852, 1650, 1501, 1444, 1220 cm<sup>-1</sup>; <sup>1</sup>H NMR (300MHz, CDCl<sub>3</sub>, TMS) δ= 7.40-7.47 (m, 2H), 7.23-7.26 (m, 2H), 7.08-7.10 (m, 1H), 6.45 (s, 1H), 2.75 (q, *J* = 7.3 Hz, 2H), 2.46 (s, 3H), 2.38 (s, 3H), 0.88 (t, *J* = 7.3 Hz, 3H) ppm; <sup>13</sup>C NMR (75MHz, CDCl<sub>3</sub>, TMS) δ 12.8, 15.0, 25.2, 30.1, 116.0, 120.2, 121.5, 122.6, 126.0, 128.9, 129.4, 135.6, 141.2, 199.7 ppm. ESI-MS: 228 (M+H)<sup>+</sup>.

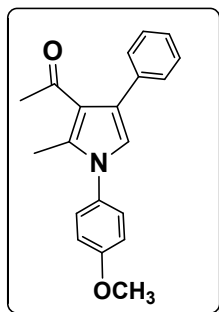

**1-(1-(4-methoxyphenyl)-2-methyl-4-phenyl-1H-pyrrol-3-yl)ethanone (Table 3, Entry 1):** Light yellow solid, mp 92-95°C. IR (KBr) 2922, 2852, 1651, 1501, 1412, 1222  $\text{cm}^{-1}$ ;  $^1\text{H}$  NMR (300MHz,  $\text{CDCl}_3$ , TMS)  $\delta$ = 7.36-7.38 (m, 4H), 7.24 (d,  $J$  = 8.9 Hz, 3H), 6.98 (d,  $J$  = 8.9 Hz, 2H), 6.62 (s, 1H), 3.86 (s, 3H), 2.37 (s, 3H), 2.07 (s, 3H) ppm;  $^{13}\text{C}$  NMR (75MHz,  $\text{CDCl}_3$ , TMS)  $\delta$  12.7, 31.0, 55.5, 110.0, 114.3, 120.7, 122.0, 125.9, 126.6, 127.3, 128.1, 129.2, 131.5, 135.6, 159.1, 197.6 ppm. HRMS:  $m/z$  calcd for  $\text{C}_{20}\text{H}_{19}\text{NNaO}_2$  328.1313; found 328.1310.

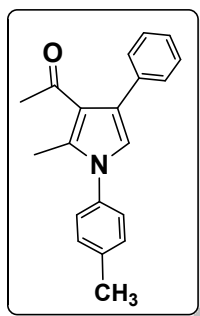

**1-(2-methyl-4-phenyl-1-p-tolyl-1H-pyrrol-3-yl) ethanone (Table 3, Entry 2):** Brown oil. IR (KBr) 3022, 2924, 1649, 1498, 1408, 1223  $\text{cm}^{-1}$ ;  $^1\text{H}$  NMR (300MHz,  $\text{CDCl}_3$ , TMS)  $\delta$ = 7.38-7.45 (m, 3H), 7.32 (d,  $J$  = 7.7 Hz, 2H), 7.23-7.25 (m, 2H), 7.20 (d,  $J$  = 7.7 Hz, 2H), 6.60 (s, 1H), 2.40 (s, 6H), 2.09 (s, 3H) ppm;  $^{13}\text{C}$  NMR (75MHz,  $\text{CDCl}_3$ , TMS)  $\delta$  12.8, 29.6, 30.9, 111.8, 120.4, 122.4, 125.2, 126.1, 128.2, 128.4, 129.0, 130.4, 132.5, 134.4, 136.0, 138.6, 157.8, 196.9 ppm. HRMS:  $m/z$  calcd for  $\text{C}_{20}\text{H}_{20}\text{NO}$  (M+1) 290.1544; found 290.1548.

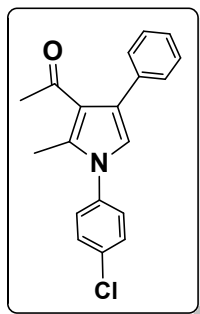

**1-(1-(4-chlorophenyl)-2-methyl-4-phenyl-1H-pyrrol-3-yl)ethanone (Table 3, Entry 3)**  
: White solid, mp 130-132°C. IR (KBr) 2930, 2850, 1651, 1505, 1408, 1224 cm<sup>-1</sup>; <sup>1</sup>H NMR (300MHz, CDCl<sub>3</sub>, TMS) δ= 7.42-7.48 (m, 3H), 7.26-7.33 (m, 6H), 6.62 (s, 1H), 2.39 (s, 3H), 2.09 (s, 3H) ppm; <sup>13</sup>C NMR (75MHz CDCl<sub>3</sub>, TMS) δ 12.9, 29.6, 114.2, 120.4, 122.6, 125.2, 126.8, 128.0, 128.4, 129.2, 130.4, 135.5, 137.0, 197.0 ppm. HRMS: *m/z* calcd for C<sub>19</sub>H<sub>16</sub>ClNNaO 332.0818; found 332.0813.

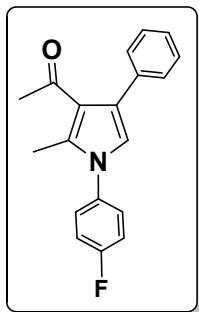

**1-(1-(4-fluorophenyl)-2-methyl-4-phenyl-1H-pyrrol-3-yl)ethanone (Table 3, Entry 4)**  
: Brown solid, mp 79-83°C. IR (KBr) 3051, 2924, 1650, 1509, 1406, 1222 cm<sup>-1</sup>; <sup>1</sup>H NMR (300MHz, CDCl<sub>3</sub>, TMS) δ= 7.37 (brs, 4H), 7.29-7.33 (m, 3H), 7.18 (t, *J* = 8.6 Hz, 2H), 6.63 (s, 1H), 2.38 (s, 3H), 2.06 (s, 3H) ppm; <sup>13</sup>C NMR (75MHz, CDCl<sub>3</sub>, TMS) δ 12.9, 31.4, 111.6, 120.4, 121.8, 125.2, 126.9, 128.0, 128.6, 129.2, 130.5, 135.0, 153.4, 196.6 ppm. ESI-MS: 294 (M+H)<sup>+</sup>.

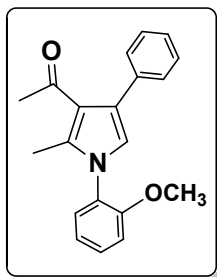

**1-(1-(2-methoxyphenyl)-2-methyl-4-phenyl-1H-pyrrol-3-yl)ethanone (Table 3, Entry 5)**  
: Pale yellow solid, mp 93-96°C. IR (KBr) 2922, 2850, 1649, 1499, 1410, 1226 cm<sup>-1</sup>; <sup>1</sup>H NMR (300MHz, CDCl<sub>3</sub>, TMS) δ= 7.33-7.37 (m, 4H), 7.20 (d, *J* = 7.7 Hz, 3H), 7.05 (d, *J* = 7.7 Hz, 2H), 6.56 (s, 1H), 3.82 (s, 3H), 2.30 (s, 3H), 2.09 (s, 3H) ppm; <sup>13</sup>C NMR (75MHz, CDCl<sub>3</sub>, TMS) δ 12.9, 31.0, 55.0, 110.9, 114.6, 121.0, 122.5, 125.5, 127.0, 127.3, 128.5, 129.4, 131.2, 135.4, 157.1, 197.6 ppm. HRMS: *m/z* calcd for C<sub>20</sub>H<sub>19</sub>NNaO<sub>2</sub> 328.1313; found 328.1310.

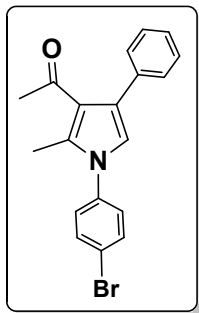

**1-(1-(4-bromophenyl)-2-methyl-4-phenyl-1H-pyrrol-3-yl)ethanone (Table 3, Entry 6)**: Red solid, mp 122-125°C. IR (KBr) 3115, 2924, 1649, 1500, 1406, 1222  $\text{cm}^{-1}$ ;  $^1\text{H}$  NMR (300MHz,  $\text{CDCl}_3$ , TMS)  $\delta$ = 7.60 (d,  $J$  = 8.3 Hz, 2H), 7.36 (brs, 3H), 7.17-7.21 (m, 4H), 6.62 (s, 1H), 2.38 (s, 3H), 2.06 (s, 3H) ppm;  $^{13}\text{C}$  NMR (75MHz,  $\text{CDCl}_3$ , TMS)  $\delta$  13.1, 31.1, 111.2, 120.8, 122.6, 124.5, 125.1, 126.1, 127.3, 128.0, 128.5, 129.4, 132.0, 135.3, 137.6, 139.0, 196.3 ppm. HRMS:  $m/z$  calcd for  $\text{C}_{19}\text{H}_{17}\text{BrNO}$  (M+1) 354.0493; found 354.0488.

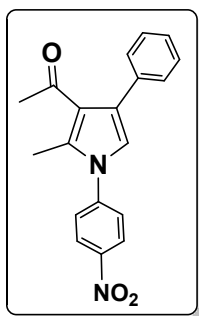

**1-(2-methyl-1-(4-nitrophenyl)-4-phenyl-1H-pyrrol-3-yl) ethanone (Table 3, Entry 7)**: Yellow oil. IR (KBr) 2922, 2853, 1649, 1503, 1410, 1222  $\text{cm}^{-1}$ ;  $^1\text{H}$  NMR (300MHz,  $\text{CDCl}_3$ , TMS)  $\delta$ = 8.40 (d,  $J$  = 8.3 Hz, 2H), 7.50-7.62 (m, 4H), 7.45-7.48 (m, 2H), 7.38 (s, 1H), 6.78 (s, 1H), 2.42 (s, 3H), 2.16 (s, 3H) ppm;  $^{13}\text{C}$  NMR (75MHz,  $\text{CDCl}_3$ , TMS)  $\delta$  12.9, 31.1, 110.0, 116.5, 120.5, 121.6, 122.6, 123.6, 124.5, 126.2, 126.9, 127.5, 129.0, 129.5, 143.9, 146.2, 199.0 ppm. HRMS:  $m/z$  calcd for  $\text{C}_{19}\text{H}_{17}\text{N}_2\text{O}_3$  (M+1) 321.1239; found 321.1225.

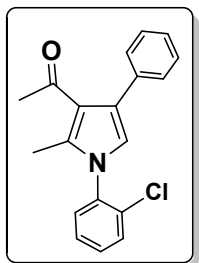

**1-(1-(2-chlorophenyl)-2-methyl-4-phenyl-1H-pyrrol-3-yl)ethanone (Table 3, Entry 8)**: White solid, mp 132-134°C. IR (KBr) 2930, 2851, 1649, 1505, 1402, 1222  $\text{cm}^{-1}$ ;  $^1\text{H}$

NMR (300MHz, CDCl<sub>3</sub>, TMS)  $\delta$ = 7.53-7.56 (m, 1H), 7.28-7.43 (m, 8H), 6.53 (s, 1H), 2.27 (s, 3H), 2.07 (s, 3H) ppm; <sup>13</sup>C NMR (75MHz, CDCl<sub>3</sub>, TMS)  $\delta$  12.8, 29.8, 114.0, 121.0, 122.8, 125.0, 127.0, 128.2, 128.6, 129.0, 131.0, 135.5, 137.2, 157.0, 198.2 ppm. HRMS: *m/z* calcd for C<sub>19</sub>H<sub>16</sub>ClNNaO 332.0818; found 332.0813.

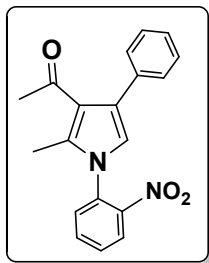

**1-(2-methyl-1-(2-nitrophenyl)-4-phenyl-1H-pyrrol-3-yl) ethanone (Table 3, Entry 9):** yellow oil. IR (KBr) 2924, 2850, 1651, 1499, 1409, 1224 cm<sup>-1</sup>; <sup>1</sup>H NMR (300MHz, CDCl<sub>3</sub>, TMS)  $\delta$ = 8.38 (d, *J* = 8.3 Hz, 2H), 7.54-7.60 (m, 4H), 7.43-7.48 (m, 2H), 7.35 (s, 1H), 6.69 (s, 1H), 2.40 (s, 3H), 2.19 (s, 3H) ppm; <sup>13</sup>C NMR (75MHz, CDCl<sub>3</sub>, TMS)  $\delta$  12.8, 31.0, 110.2, 117.0, 120.9, 121.2, 122.5, 124.0, 125.0, 126.2, 127.0, 127.5, 128.7, 129.5, 144.2, 145.8, 197.8 ppm. HRMS: *m/z* calcd for C<sub>19</sub>H<sub>17</sub>N<sub>2</sub>O<sub>3</sub> (M+1) 321.1239; found 321.1225.

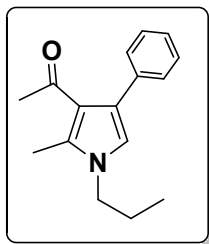

**1-(2-methyl-4-phenyl-1-propyl-1H-pyrrol-3-yl)ethanone (Table 3, Entry 10):** Brown oil. IR (KBr) 2924, 2850, 1651, 1499, 1409, 1224 cm<sup>-1</sup>; <sup>1</sup>H NMR (300MHz, CDCl<sub>3</sub>, TMS)  $\delta$ = 7.25-7.33 (m, 5H), 6.44 (s, 1H), 3.80 (t, *J* = 6.7 Hz, 2H), 2.52 (s, 3H), 2.37 (s, 3H), 1.70 (dd, *J* = 6.7 Hz, 2H), 0.96 (t, *J* = 6.7 Hz, 3H) ppm; <sup>13</sup>C NMR (75MHz, CDCl<sub>3</sub>, TMS)  $\delta$  12.2, 13.0, 27.5, 31.0, 56.2, 107.1, 122.5, 127.2, 127.5, 128.4, 129.2, 133.2, 137.5, 199.2 ppm. ESI-MS: 242 (M+H)<sup>+</sup>.

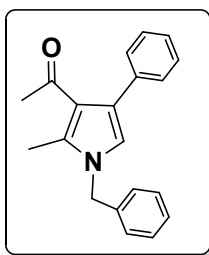

**1-(1-Benzyl-2-methyl-4-phenyl-1H-pyrrol-3-yl) ethanone (Table 4, Entry 1):** Brown oil. IR (KBr) 3029, 2924, 1651, 1499, 1407, 1222  $\text{cm}^{-1}$ ;  $^1\text{H}$  NMR (300MHz,  $\text{CDCl}_3$ , TMS)  $\delta$ = 7.44 (d,  $J$  = 8.3 Hz, 2H), 7.32-7.38 (m, 5H), 7.22-7.27 (m, 3H), 6.64 (s, 1H), 5.04 (s, 2H), 2.41 (s, 3H), 2.10 (s, 3H) ppm;  $^{13}\text{C}$  NMR (75MHz,  $\text{CDCl}_3$ , TMS)  $\delta$  12.8, 31.0, 51.0, 110.2, 120.9, 125.2, 125.8, 127.0, 127.2, 127.5, 128.4, 128.8, 129.1, 129.4, 133.0, 136.2, 198.6 ppm. HRMS:  $m/z$  calcd for  $\text{C}_{20}\text{H}_{19}\text{NNaO}$  312.1364; found 312.1375.

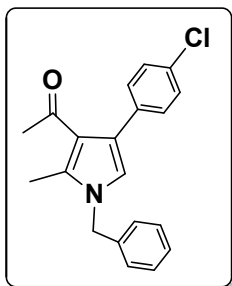

**1-(1-Benzyl-4-(4-chlorophenyl)-2-methyl-1H-pyrrol-3-yl) ethanone (Table 4, Entry 2):** Yellow oil. IR (KBr) 3030, 2928, 1649, 1501, 1410, 1224  $\text{cm}^{-1}$ ;  $^1\text{H}$  NMR (300MHz,  $\text{CDCl}_3$ , TMS)  $\delta$ = 7.28-7.37 (m, 4H), 7.26 (d,  $J$  = 8.3 Hz, 2H), 7.20-7.24 (m, 3H), 6.60 (s, 1H), 5.05 (s, 2H), 2.40 (s, 3H), 2.09 (s, 3H) ppm;  $^{13}\text{C}$  NMR (75MHz,  $\text{CDCl}_3$ , TMS)  $\delta$  12.6, 31.1, 51.1, 120.0, 122.2, 123.8, 126.8, 127.5, 128.4, 128.8, 129.4, 133.0, 134.5, 135.2, 136.2, 197.9 ppm. ESI-MS: 324 (M+H) $^+$ .

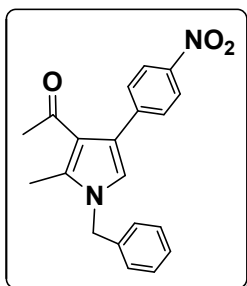

**1-(1-Benzyl-2-methyl-4-(4-nitrophenyl)-1H-pyrrol-3-yl) ethanone (Table 4, Entry 3):** Red liquid. IR (KBr) 3028, 2926, 1651, 1506, 1414, 1220  $\text{cm}^{-1}$ ;  $^1\text{H}$  NMR (300MHz,  $\text{CDCl}_3$ , TMS)  $\delta$ = 8.25 (d,  $J$  = 8.3 Hz, 2H), 7.46 (d,  $J$  = 8.3 Hz, 2H), 7.22-7.38 (m, 3H), 7.09 (d,  $J$  = 7.1 Hz, 2H), 6.62 (s, 1H), 5.08 (s, 2H), 2.42 (s, 3H), 2.12 (s, 3H) ppm;  $^{13}\text{C}$  NMR (75MHz,  $\text{CDCl}_3$ , TMS)  $\delta$  12.0, 31.2, 51.0, 120.9, 122.2, 123.5, 123.7, 126.5, 127.4, 128.2, 129.0, 129.5, 135.2, 136.4, 143.0, 147.1, 198.9 ppm. ESI-MS: 334 (M+H) $^+$ .

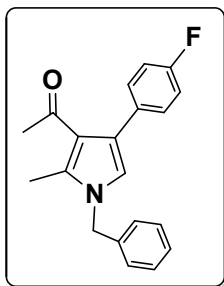

**1-(1-Benzyl-4-(4-fluorophenyl)-2-methyl-1H-pyrrol-3-yl) ethanone (Table 4, Entry 4):** Yellow oil. IR (KBr) 3030, 2928, 1650, 1498, 1409, 1226  $\text{cm}^{-1}$ ;  $^1\text{H}$  NMR (300MHz,  $\text{CDCl}_3$ , TMS)  $\delta$ = 7.25-7.36 (m, 5H), 6.92-7.09 (m, 4H), 6.58 (s, 1H), 5.10 (s, 2H), 2.42 (s, 3H), 2.03 (s, 3H) ppm;  $^{13}\text{C}$  NMR (75MHz,  $\text{CDCl}_3$ , TMS)  $\delta$  12.2, 30.8, 50.8, 111.9, 120.2, 123.2, 125.7, 126.2, 127.6, 128.5, 129.2, 130.2, 135.0, 136.4, 137.0, 198.9 ppm. ESI-MS: 308 (M+H) $^+$ .

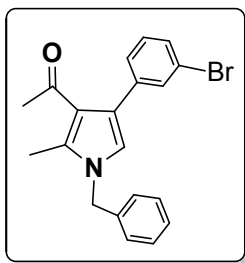

**1-(1-Benzyl-4-(3-bromophenyl)-2-methyl-1H-pyrrol-3-yl) ethanone (Table 4, Entry 5):** Orange yellow liquid. IR (KBr) 3110, 2924, 1651, 1502, 1406, 1222  $\text{cm}^{-1}$ ;  $^1\text{H}$  NMR (300MHz,  $\text{CDCl}_3$ , TMS)  $\delta$ = 7.58 (d,  $J$  = 8.3 Hz, 2H), 7.40 (brs, 3H), 7.10-7.18 (m, 4H), 6.62 (s, 1H), 5.06(s, 2H), 2.38 (s, 3H), 2.06 (s, 3H) ppm;  $^{13}\text{C}$  NMR (75MHz,  $\text{CDCl}_3$ , TMS)  $\delta$  13.1, 30.8, 51.0, 111.2, 121.0, 122.2, 123.0, 124.6, 125.1, 126.4, 127.0, 128.0, 128.5, 129.2, 132.1, 135.6, 137.6, 139.2, 197.3 ppm. ESI-MS: 368 (M+H) $^+$ .

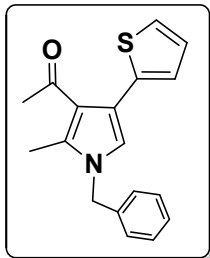

**1-(1-Benzyl-2-methyl-4-(thiophen-2-yl)-1H-pyrrol-3-yl) ethanone (Table 4, Entry 6):** Brown solid, mp 137-140°C. IR (KBr) 2926, 2854, 1646, 1499, 1382, 1222  $\text{cm}^{-1}$ ;  $^1\text{H}$  NMR (300MHz,  $\text{CDCl}_3$ , TMS)  $\delta$ = 7.40-7.46 (m, 3H), 7.30-7.37 (m, 3H), 7.04-7.18 (m, 2H), 6.70 (s, 1H), 5.14(s, 2H), 2.40 (s, 3H), 2.14 (s, 3H) ppm;  $^{13}\text{C}$  NMR (75MHz,  $\text{CDCl}_3$ , TMS)  $\delta$  13.0, 30.7, 51.2, 109.8, 111.2, 122.0, 122.6, 125.4, 126.5, 127.0, 127.6, 128.4, 129.0, 136.0, 197.8 ppm. ESI-MS: 318 (M+Na) $^+$ .

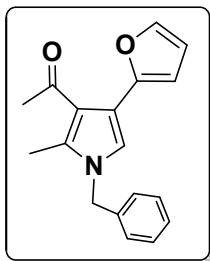

**1-(1-Benzyl-4-(furan-2-yl)-2-methyl-1H-pyrrol-3-yl)ethanone (Table 4, Entry 7):** Off-white solid, mp 110-114°C. IR (KBr) 3028, 2925, 1650, 1498, 1408, 1224  $\text{cm}^{-1}$ ;  $^1\text{H}$  NMR (300MHz,  $\text{CDCl}_3$ , TMS)  $\delta$ = 7.50-7.54 (m, 3H), 7.28-7.32 (m, 3H), 6.98-7.08 (m, 2H), 6.64 (s, 1H), 5.08(s, 2H), 2.42 (s, 3H), 2.10 (s, 3H) ppm;  $^{13}\text{C}$  NMR (75MHz,  $\text{CDCl}_3$ , TMS)  $\delta$  12.9, 29.8, 51.0, 110.6, 113.0, 121.7, 125.6, 126.2, 127.9, 128.4, 129.4, 135.8, 141.9, 150.3, 197.7 ppm. ESI-MS: 280 (M+H) $^+$ .

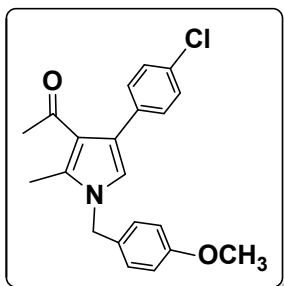

**1-(4-(4-Chlorophenyl)-1-(4-methoxybenzyl)-2-methyl-1H-pyrrol-3-yl) ethanone (Table 4, Entry 8):** Yellow liquid. IR (KBr) 2928, 2856, 1651, 1501, 1409, 1224  $\text{cm}^{-1}$ ;  $^1\text{H}$  NMR (300MHz,  $\text{CDCl}_3$ , TMS)  $\delta$ = 7.20-7.28 (m, 4H), 7.08 (d,  $J$  = 8.3 Hz, 2H), 6.82-6.94 (m, 2H), 6.56 (s, 1H), 5.05 (s, 2H), 3.76(s, 3H), 2.41 (s, 3H), 2.09 (s, 3H) ppm;  $^{13}\text{C}$  NMR (75MHz,  $\text{CDCl}_3$ , TMS)  $\delta$  12.9, 30.8, 50.9, 52.8, 110.7, 114.2, 120.0, 122.6, 123.9, 127.5, 128.2, 128.8, 129.8, 133.0, 134.7, 135.2, 136.6, 156.8, 199.6 ppm. ESI-MS: 354 (M+H) $^+$ .

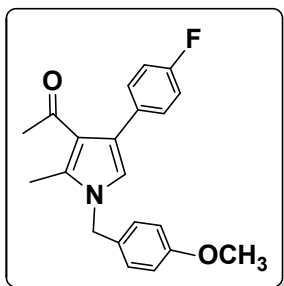

**1-(4-(4-Fluorophenyl)-1-(4-methoxybenzyl)-2-methyl-1H-pyrrol-3-yl) ethanone (Table 4, Entry 9):** Off-white solid, mp 75-78°C. IR (KBr) 3030, 2926, 1649, 1496, 1410, 1222  $\text{cm}^{-1}$ ;  $^1\text{H}$  NMR (300MHz,  $\text{CDCl}_3$ , TMS)  $\delta$ = 7.20-7.26 (m, 4H), 7.10 (d,  $J$  = 7.1 Hz, 2H), 6.89-6.97 (m, 2H), 6.64 (s, 1H), 5.09 (s, 2H), 3.74 (s, 3H), 2.38 (s, 3H), 2.08 (s, 3H) ppm;  $^{13}\text{C}$  NMR (75MHz,  $\text{CDCl}_3$ , TMS)  $\delta$  12.2, 30.8, 52.0, 54.2, 111.0, 114.2, 120.4, 123.2, 125.4, 126.2, 128.0, 128.7, 129.8, 130.8, 132.0, 136.4, 137.0, 155.2, 160.4, 199.2 ppm. ESI-MS: 338 (M+H) $^+$ .



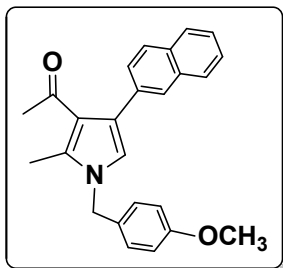

**1-(1-(4-Methoxybenzyl)-2-methyl-4-(naphthalen-2-yl)-1H-pyrrol-3-yl) ethanone (Table 4, Entry 10):** Yellow orange liquid. IR (KBr) 3030, 2923, 1649, 1499, 1406, 1226  $\text{cm}^{-1}$ ;  $^1\text{H}$  NMR (300MHz,  $\text{CDCl}_3$ , TMS)  $\delta$ = 7.80-7.85 (m, 5H), 7.74 (d,  $J$  = 8.3 Hz, 2H), 7.46-7.54 (m, 2H), 7.28 (d,  $J$  = 8.3 Hz, 2H), 6.70 (s, 1H), 3.80 (s, 3H), 2.43 (s, 3H), 2.10 (s, 3H) ppm;  $^{13}\text{C}$  NMR (75MHz,  $\text{CDCl}_3$ , TMS)  $\delta$  12.9, 29.8, 52.0, 55.4, 108.6, 114.0, 114.2, 123.6, 124.6, 125.7, 126.4, 127.3, 128.0, 128.5, 129.3, 133.8, 134.6, 135.2, 156.9, 197.7 ppm. ESI-MS: 370 (M+H) $^+$ .

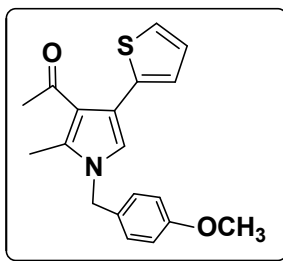

**1-(1-(4-Methoxybenzyl)-2-methyl-4-(thiophen-2-yl)-1H-pyrrol-3-yl) ethanone (Table 4, Entry 11):** Off-white solid, mp 82-85°C. IR (KBr) 2928, 2850, 1651, 1501, 1396, 1222  $\text{cm}^{-1}$ ;  $^1\text{H}$  NMR (300MHz,  $\text{CDCl}_3$ , TMS)  $\delta$ = 7.10-7.21 (m, 4H), 6.96-6.98 (m, 1H), 6.90 (d,  $J$  = 7.1 Hz, 2H), 6.64 (s, 1H), 5.10 (s, 2H), 2.40 (s, 3H), 2.09 (s, 3H) ppm;  $^{13}\text{C}$  NMR (75MHz,  $\text{CDCl}_3$ , TMS)  $\delta$  13.0, 31.0, 51.2, 56.0, 109.8, 110.9, 117.2, 122.0, 122.6, 125.4, 126.4, 127.2, 127.6, 128.5, 129.2, 135.9, 136.6, 157.8, 197.8 ppm. ESI-MS: 326 (M+H) $^+$ .

# Copies of $^1\text{H}$ NMR and $^{13}\text{C}$ NMR spectra of compounds:

(Table 2, Entry 1)

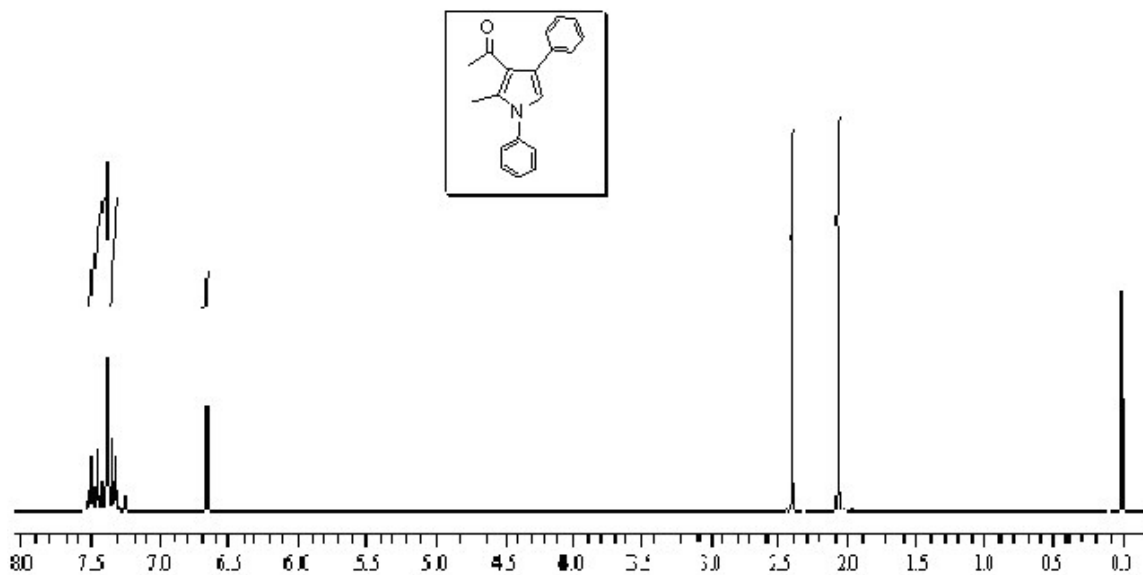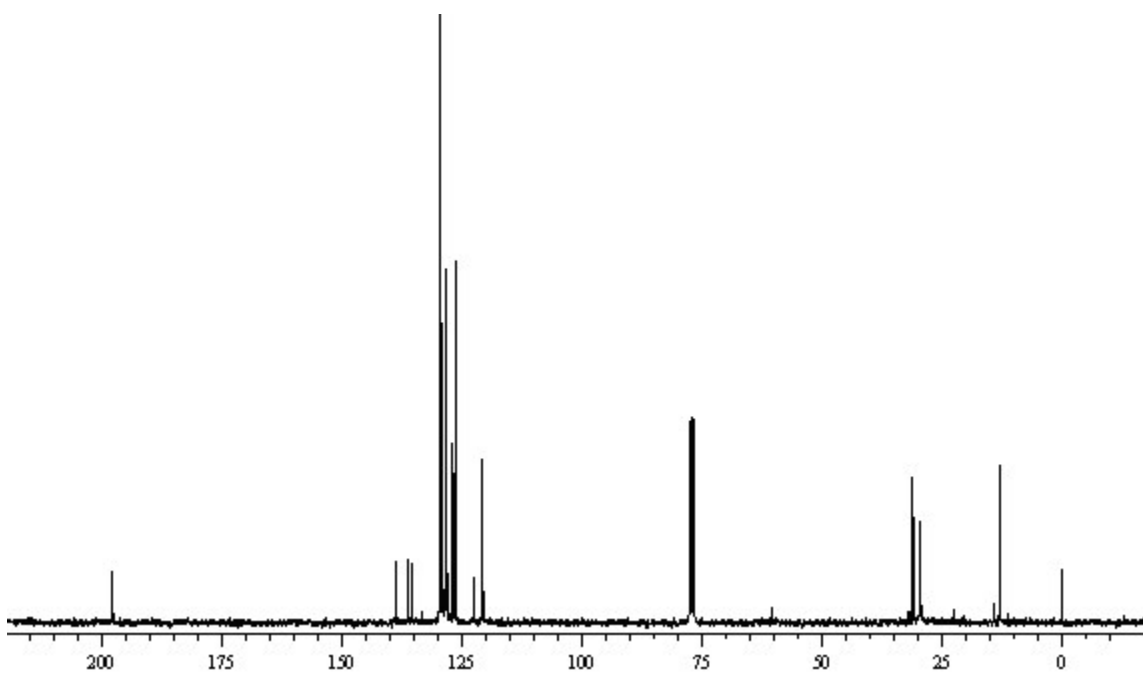

(Table 2, Entry 2)

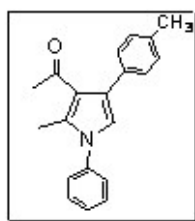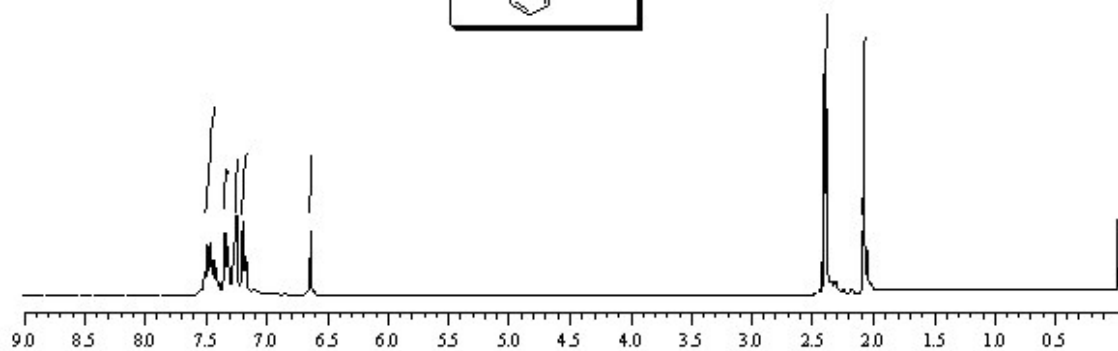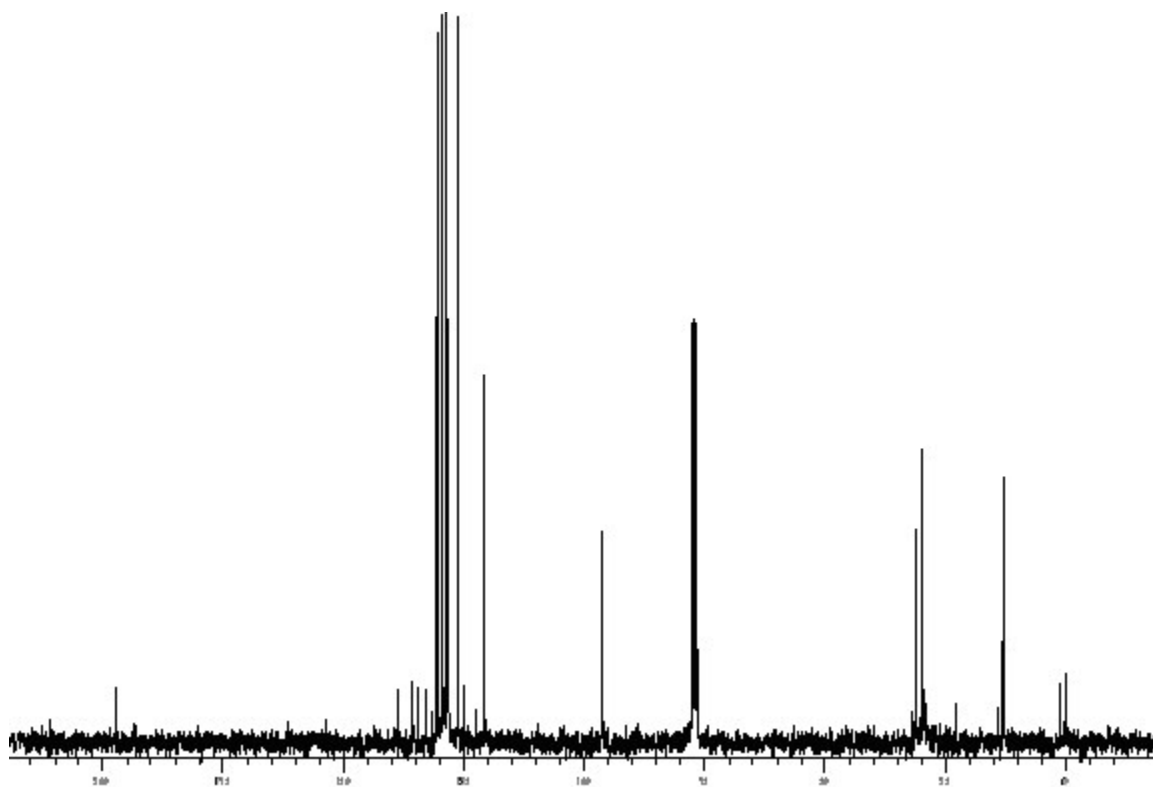

(Table 2, Entry 3)

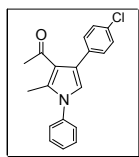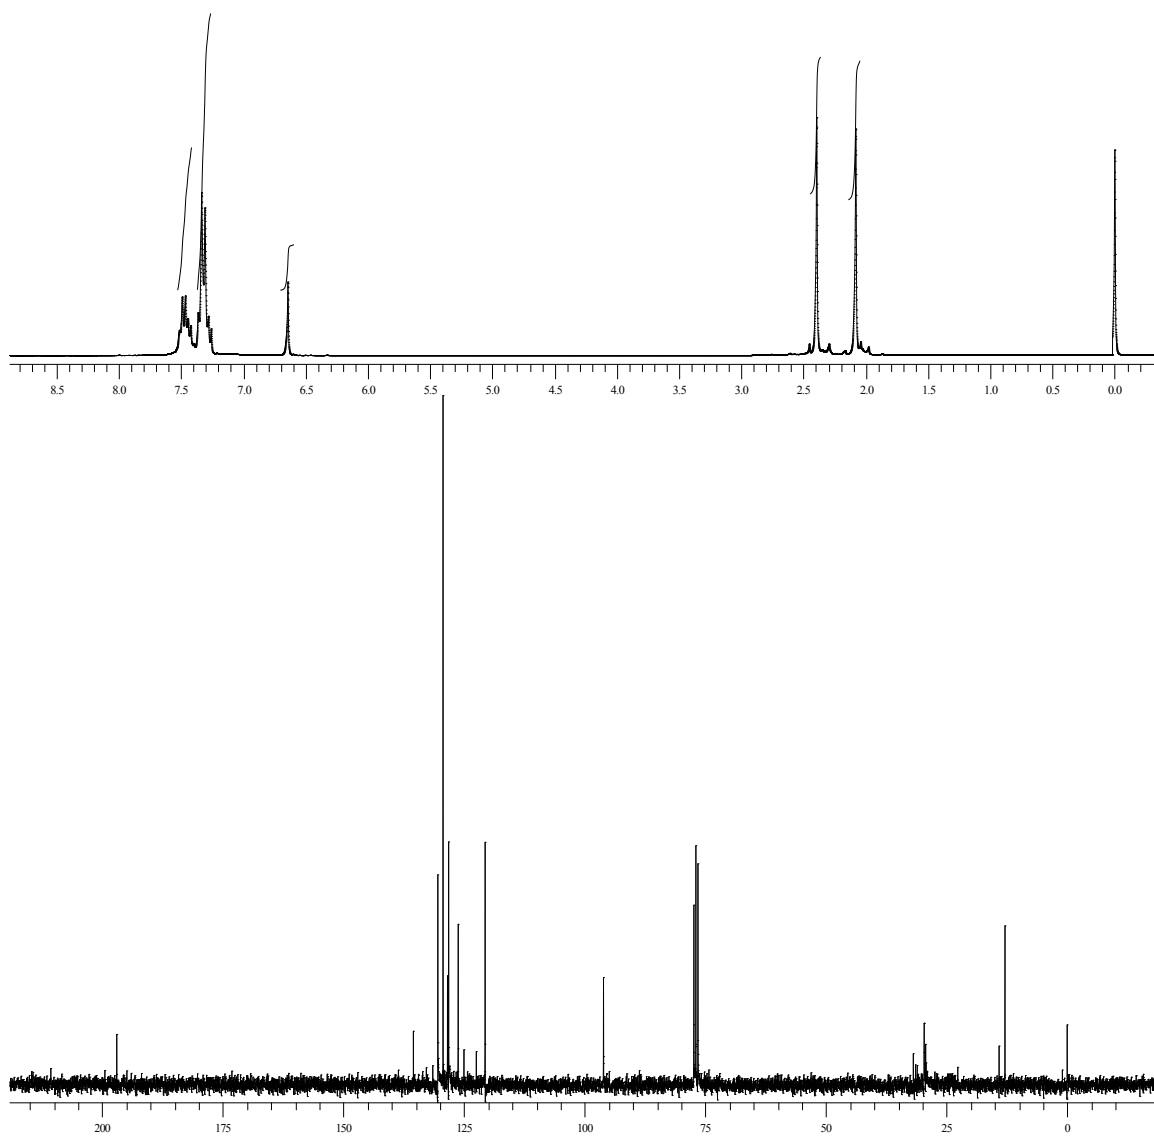

(Table 2, Entry 4)

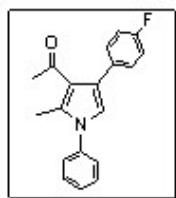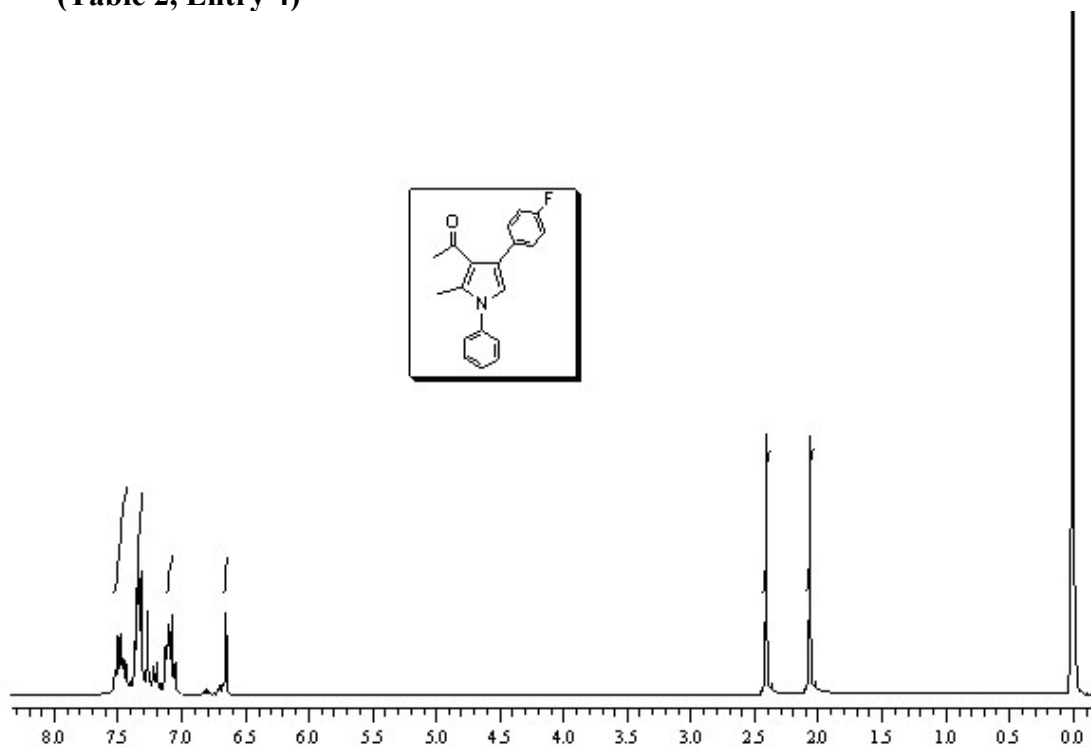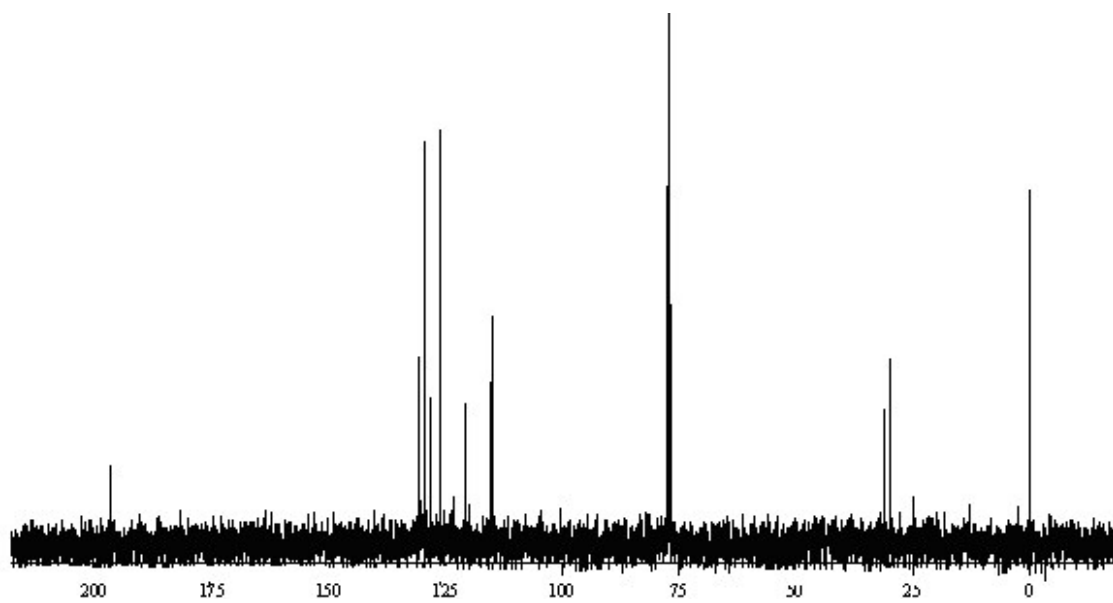

(Table 2, Entry 5)

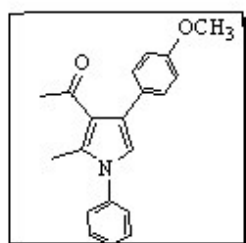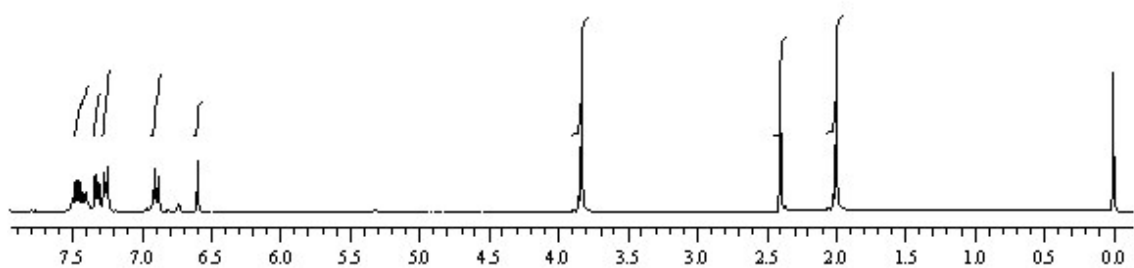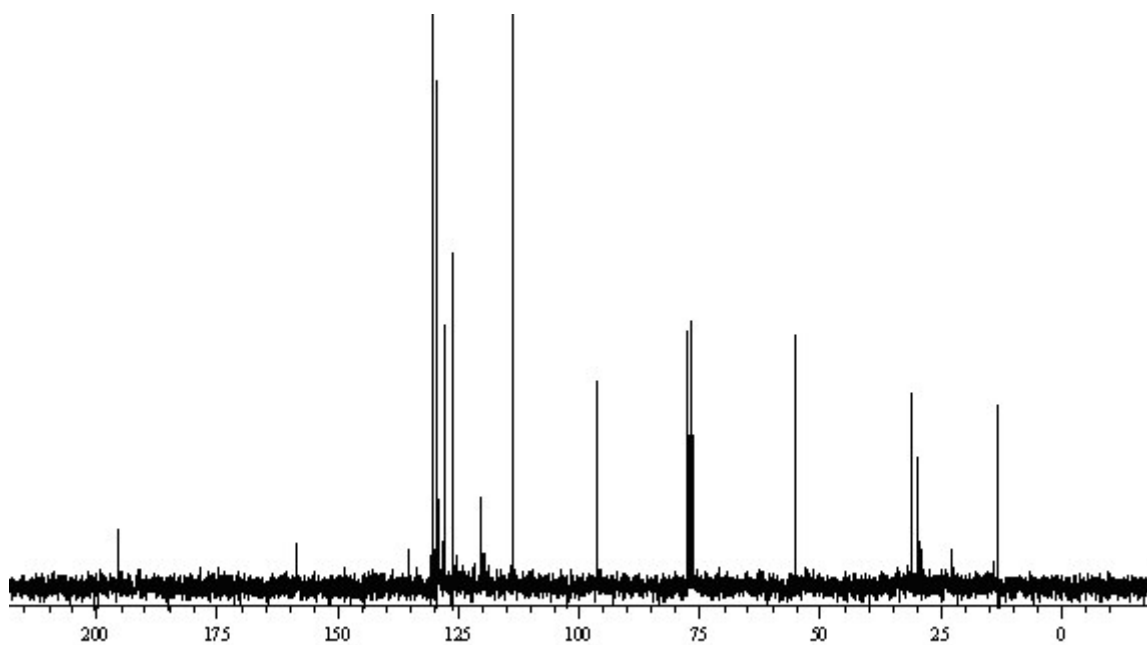

(Table 2, Entry 6)

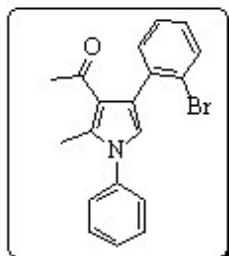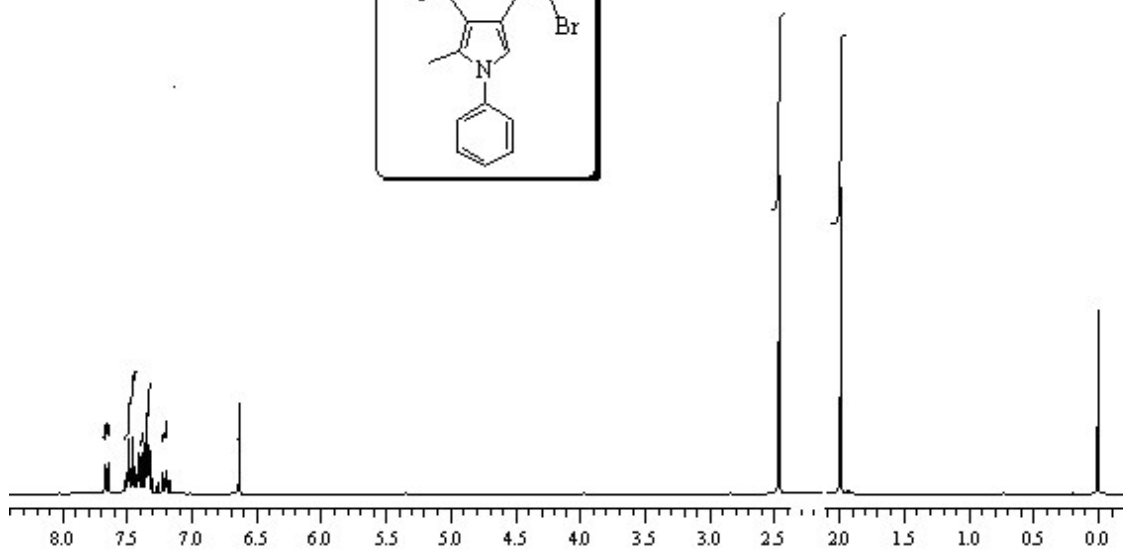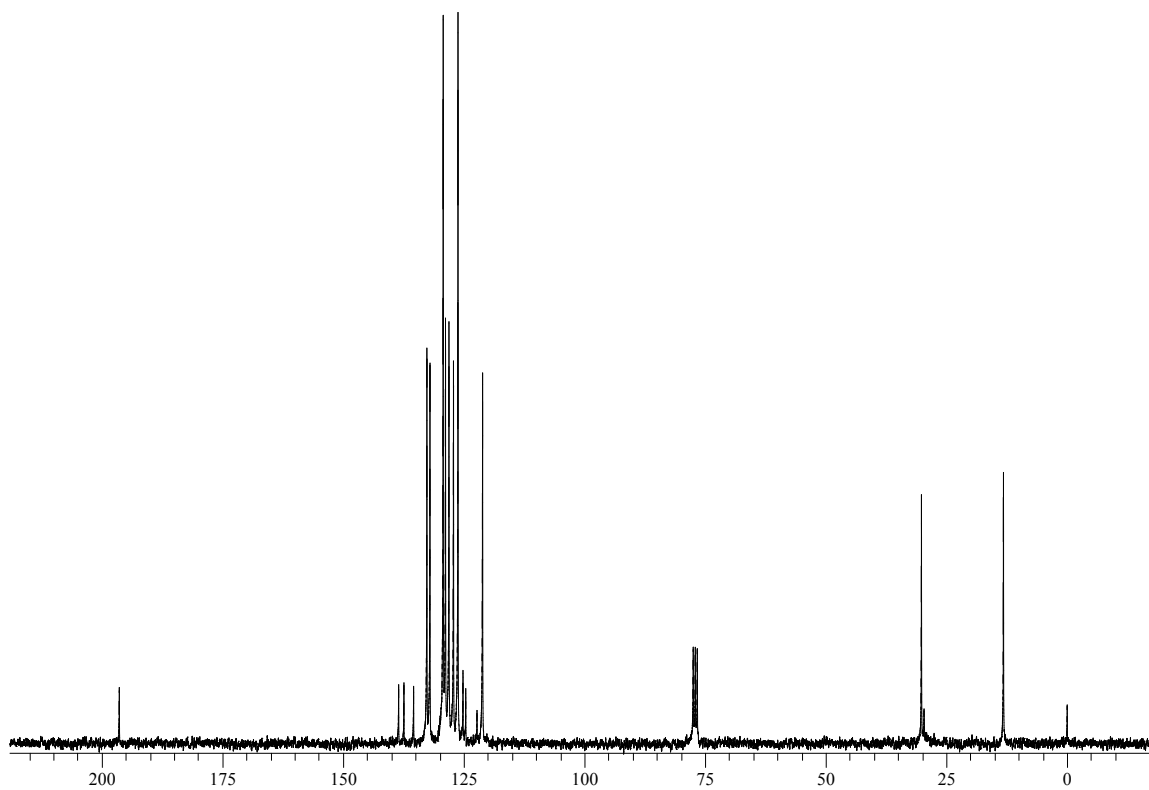

(Table 2, Entry 7)

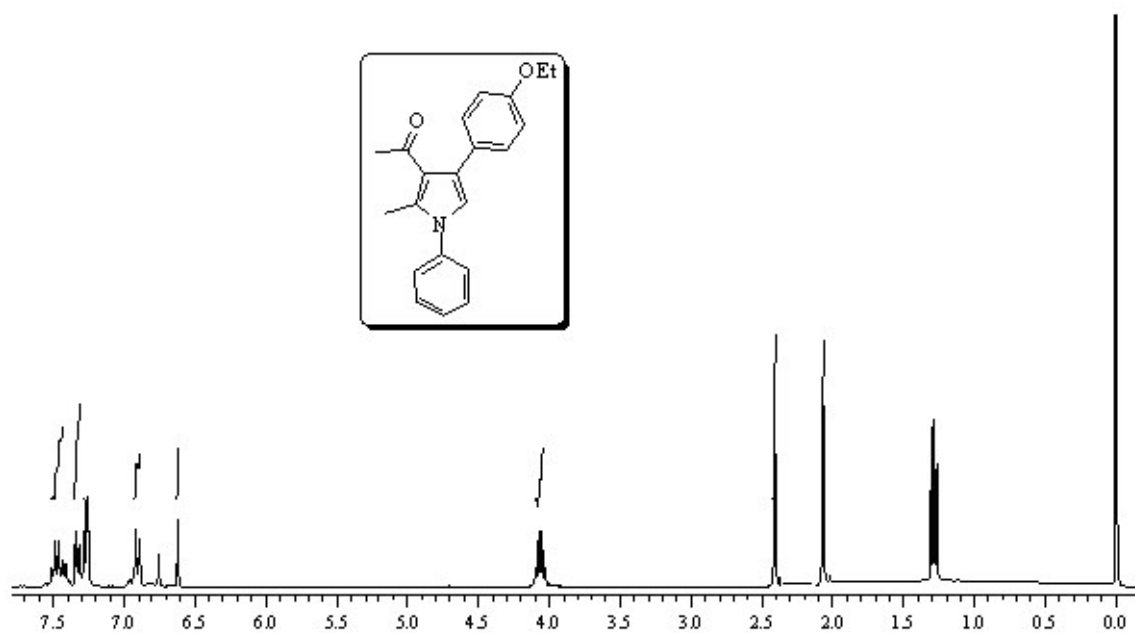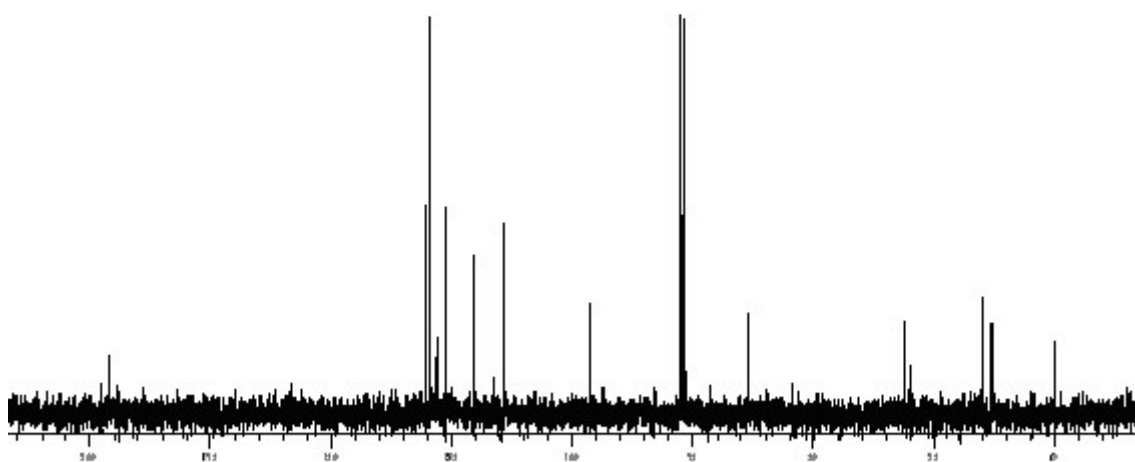



(Table 2, Entry 8)

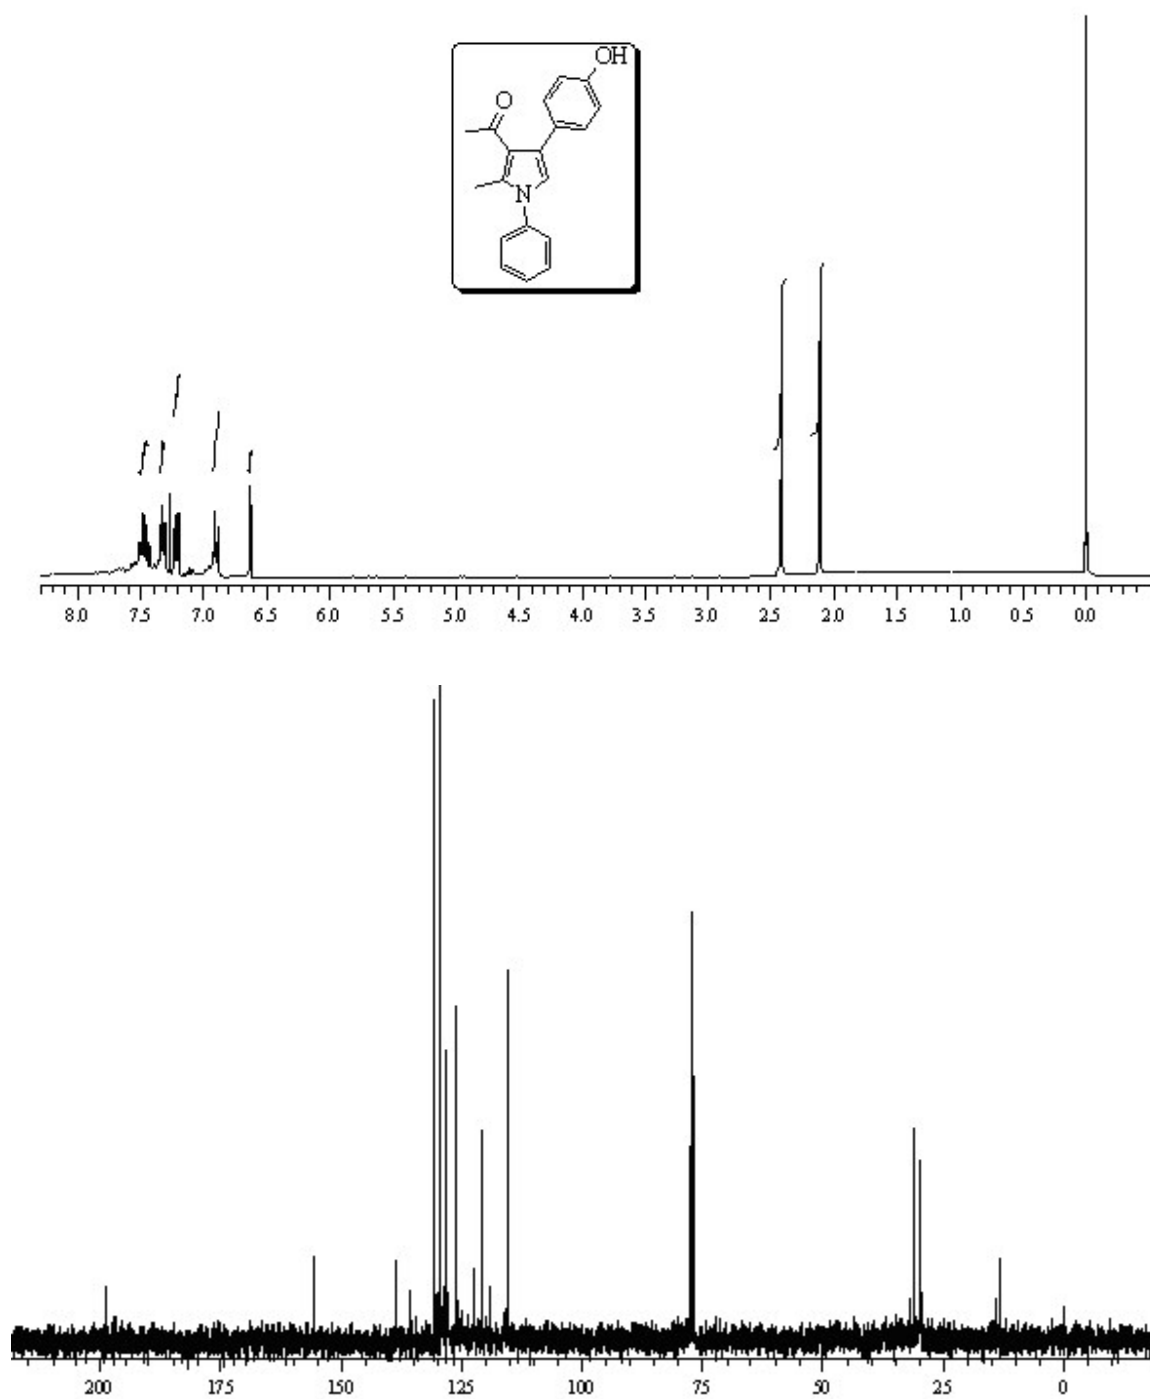

(Table 2, Entry 9)

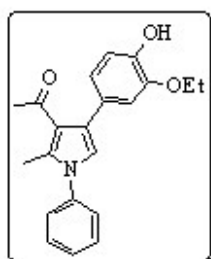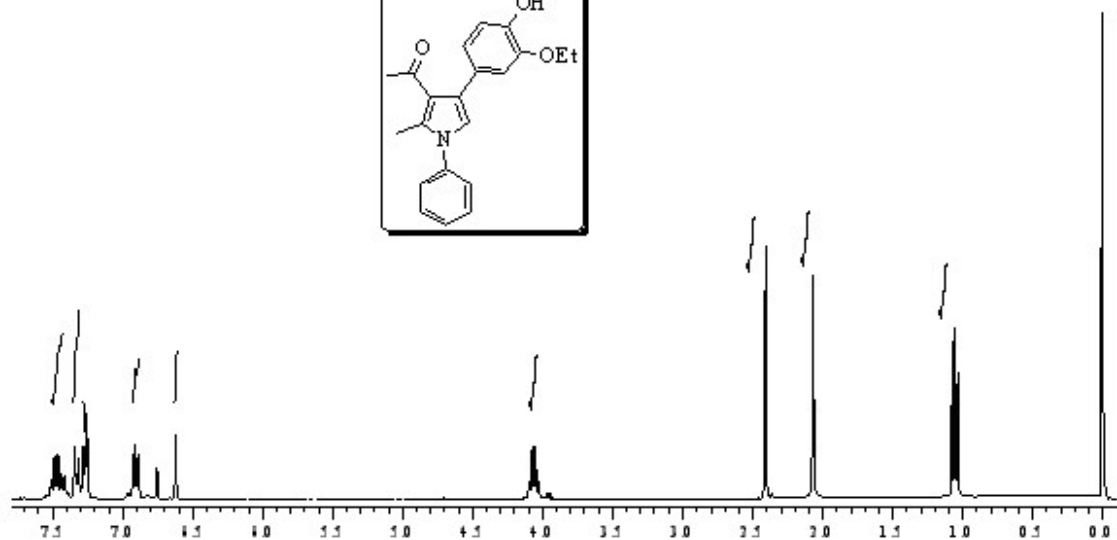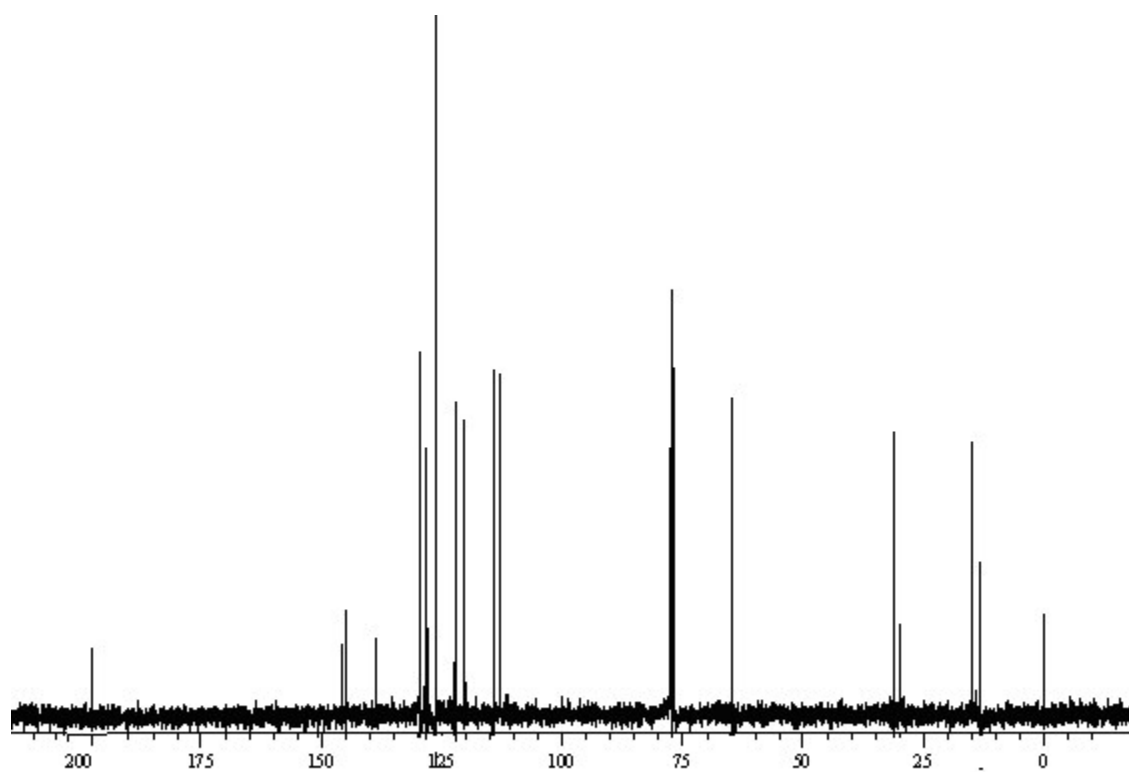

(Table 2, Entry 10)

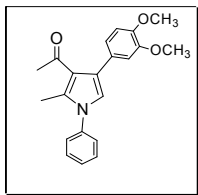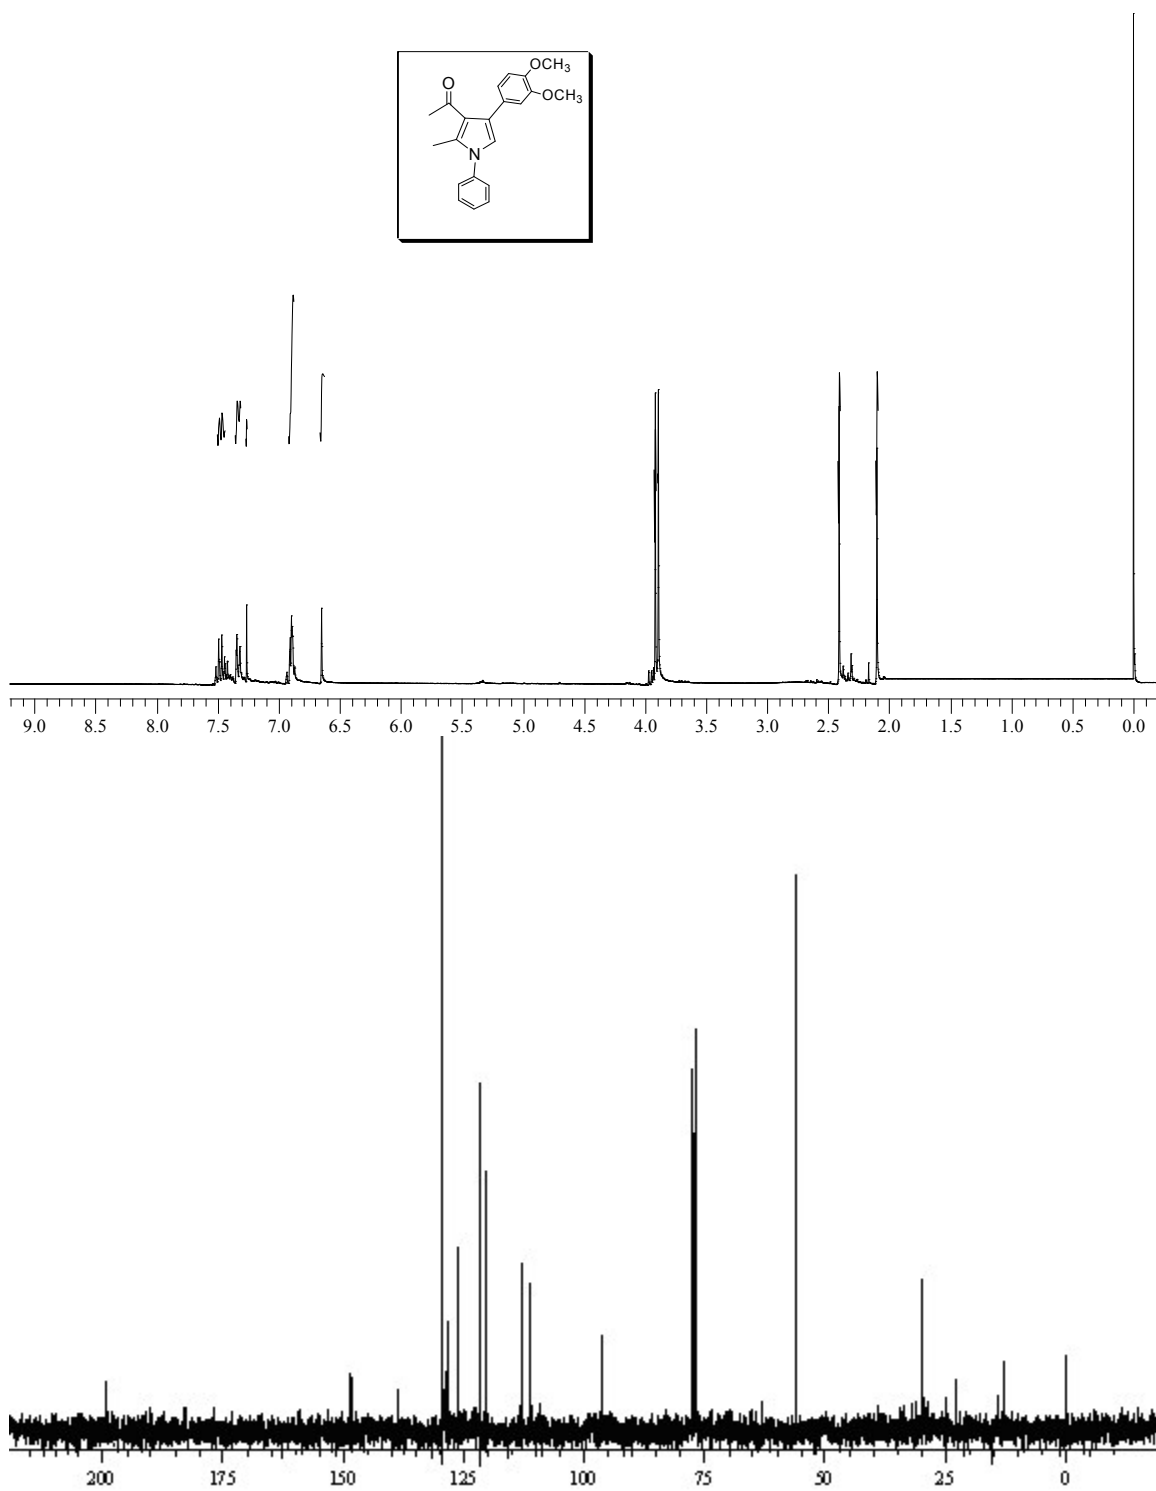

(Table 2, Entry 11)

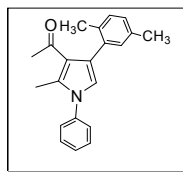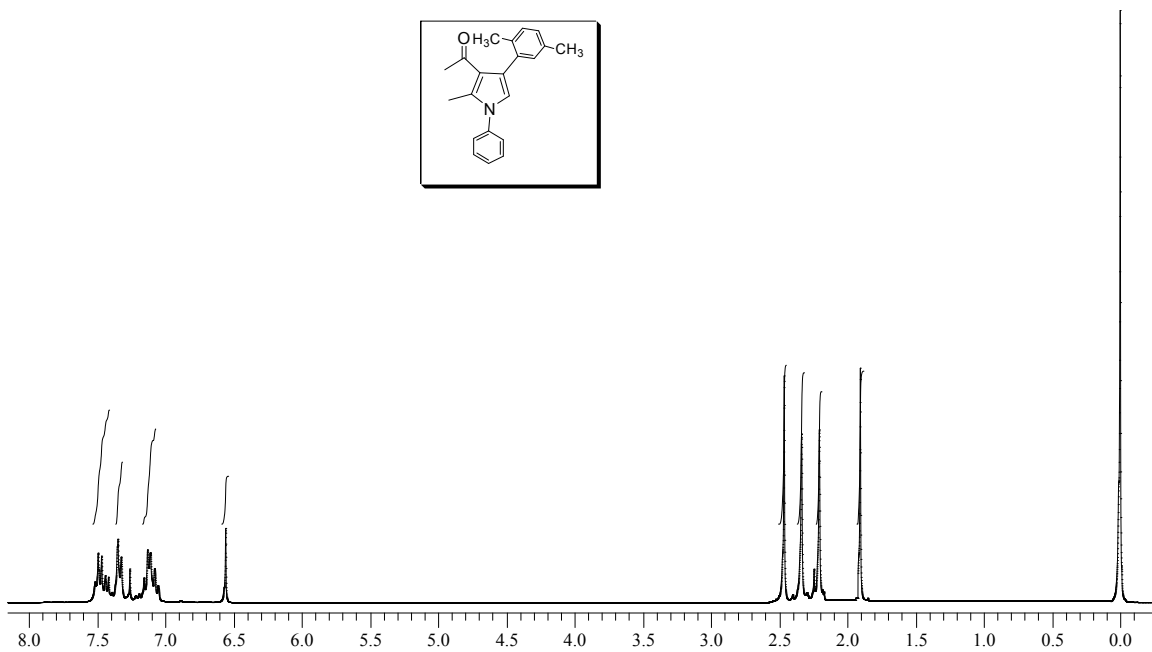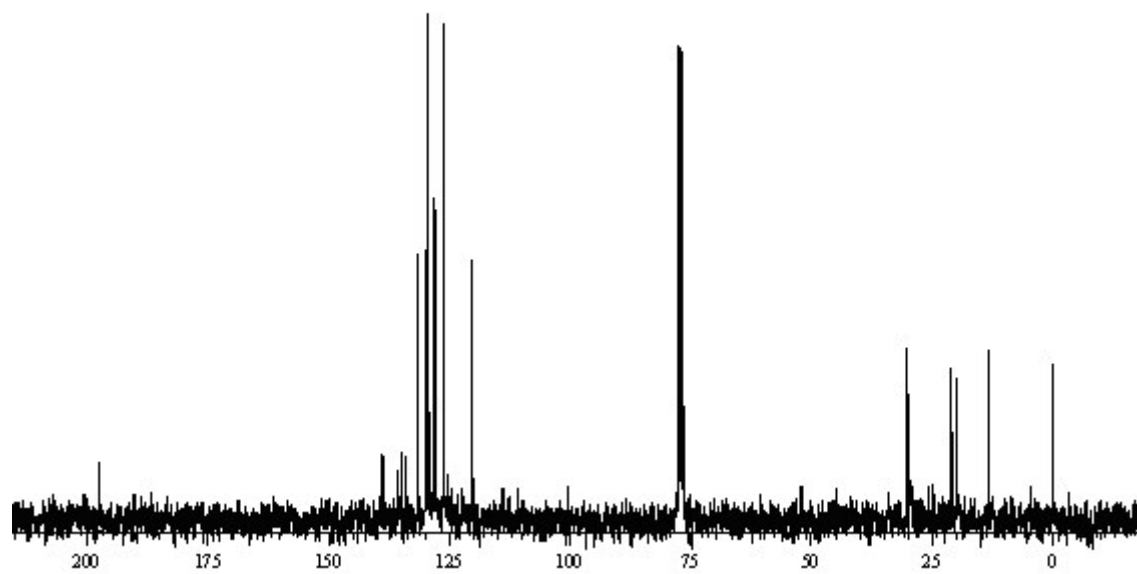

(Table 2, Entry 12)

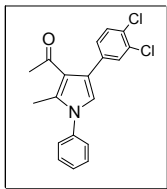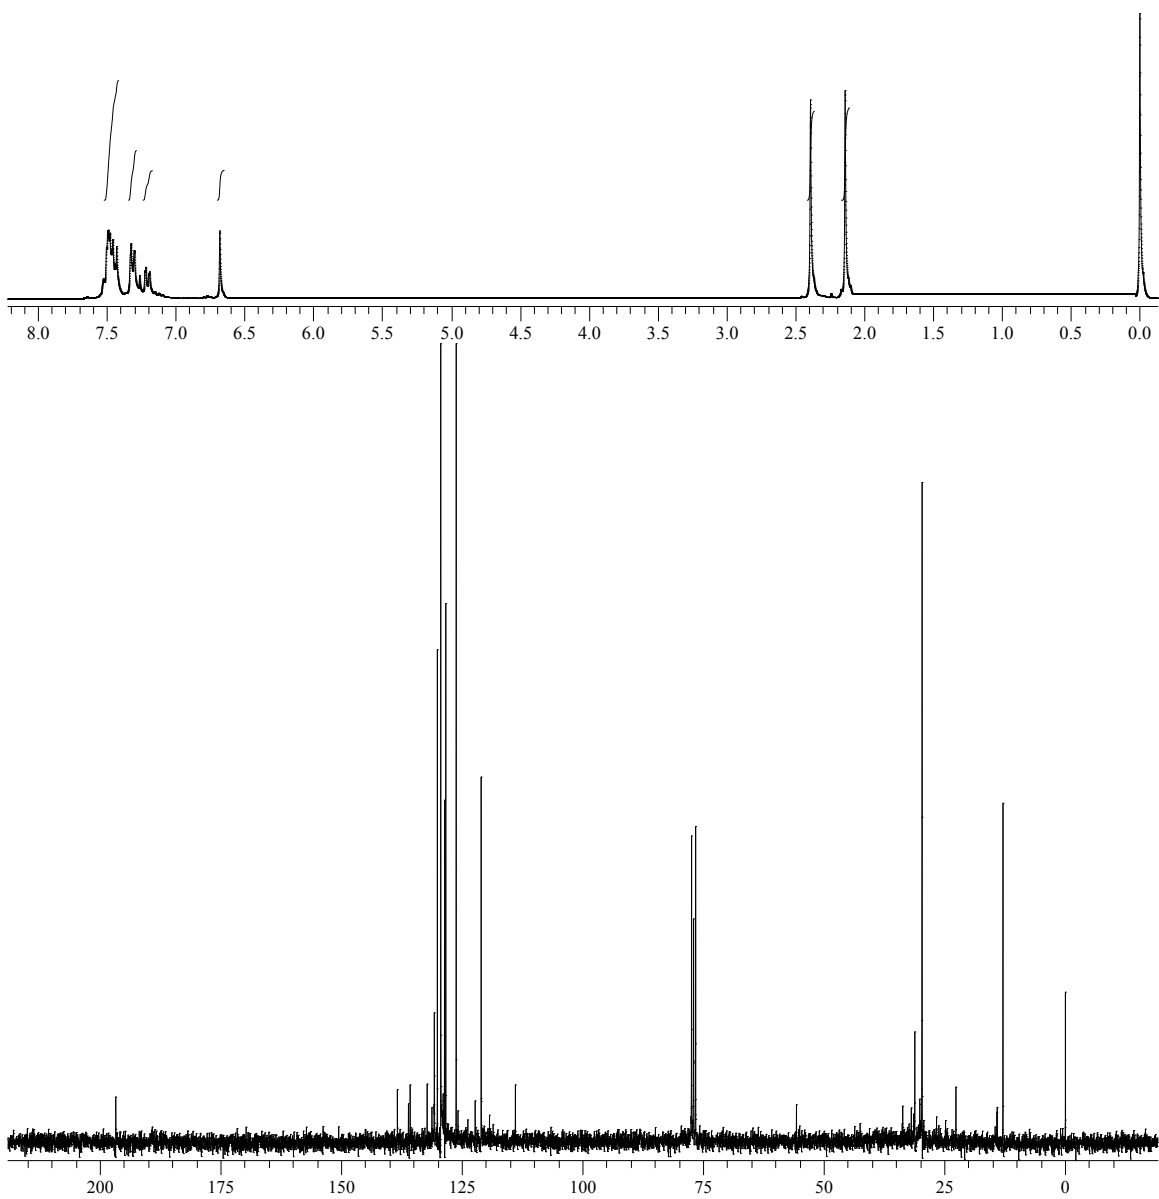

(Table 2, Entry 13)

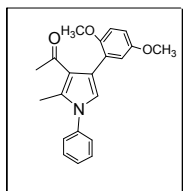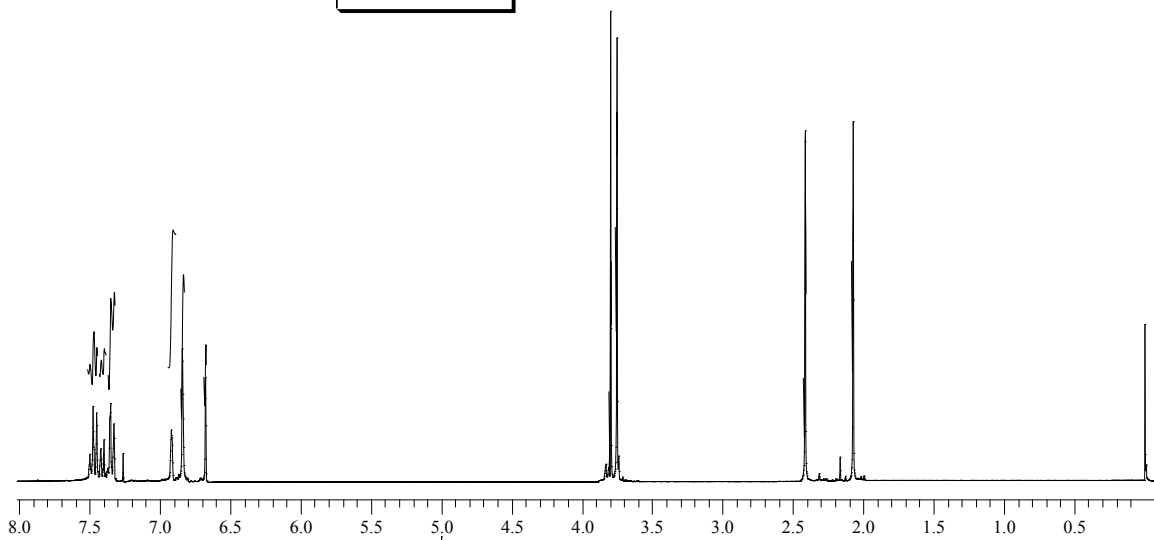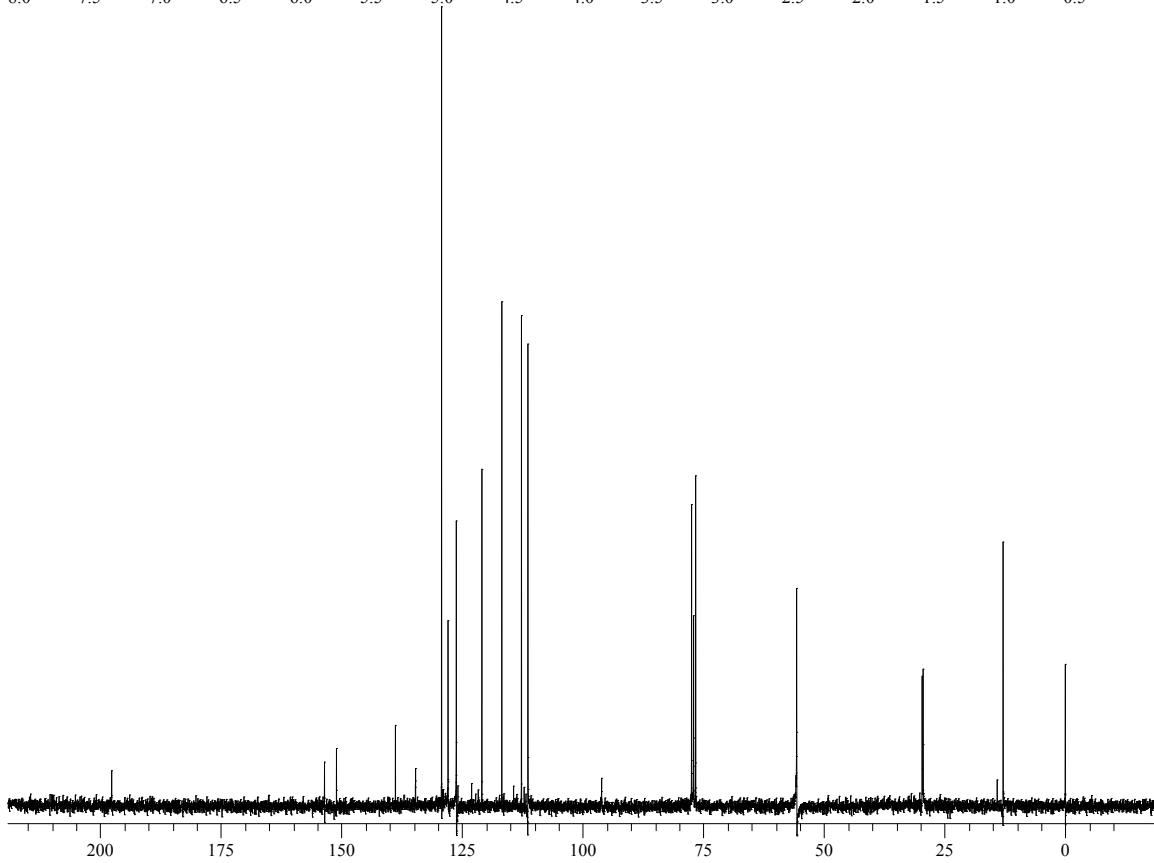

(Table 2, Entry 14)

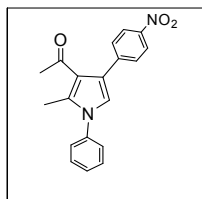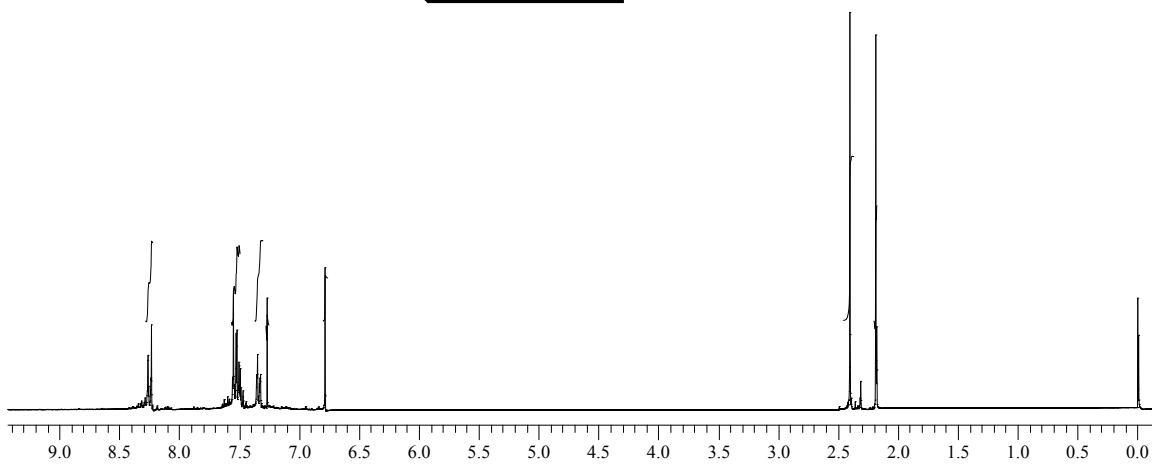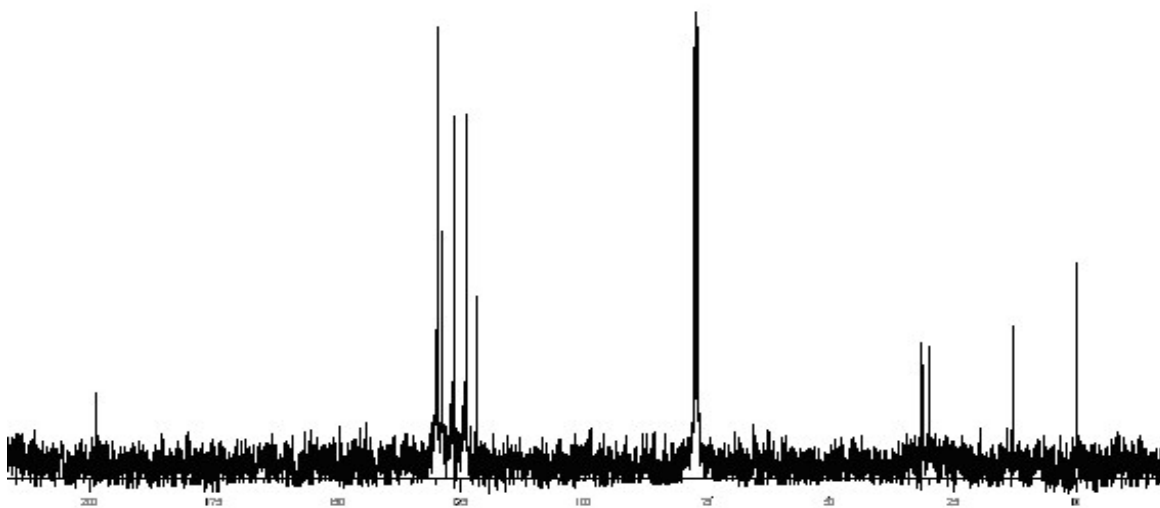

(Table 2 , Entry 15)

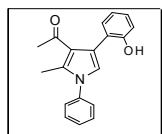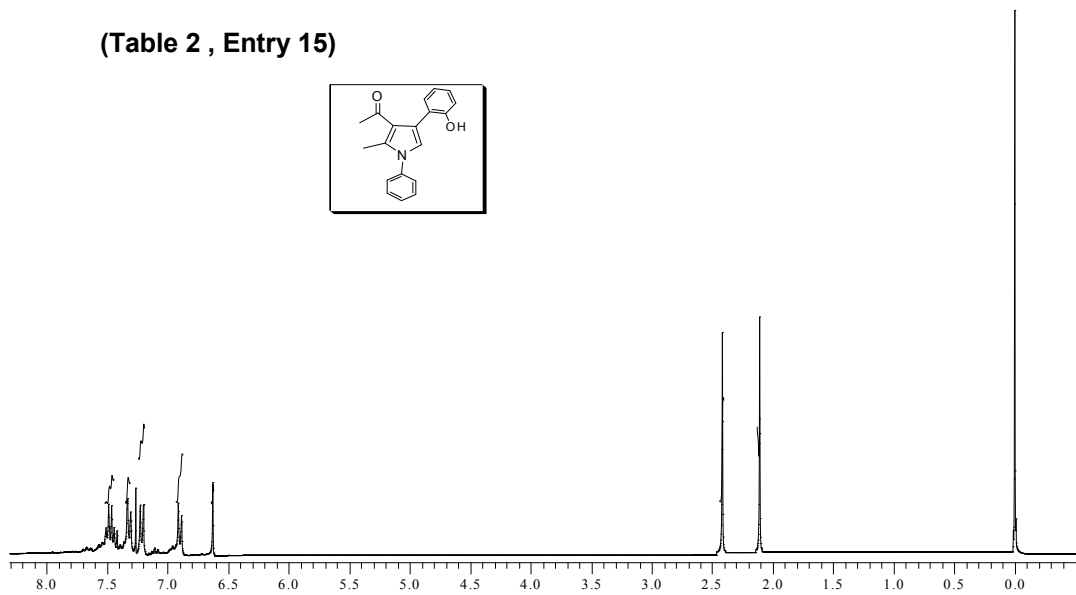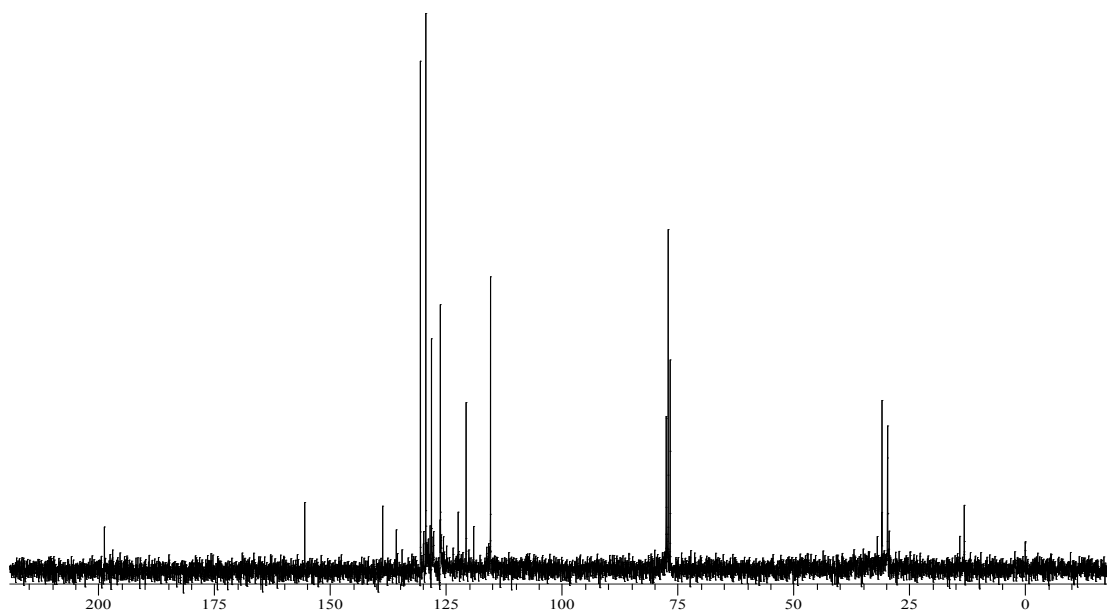



(Table 2, Entry 16)

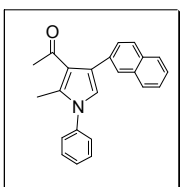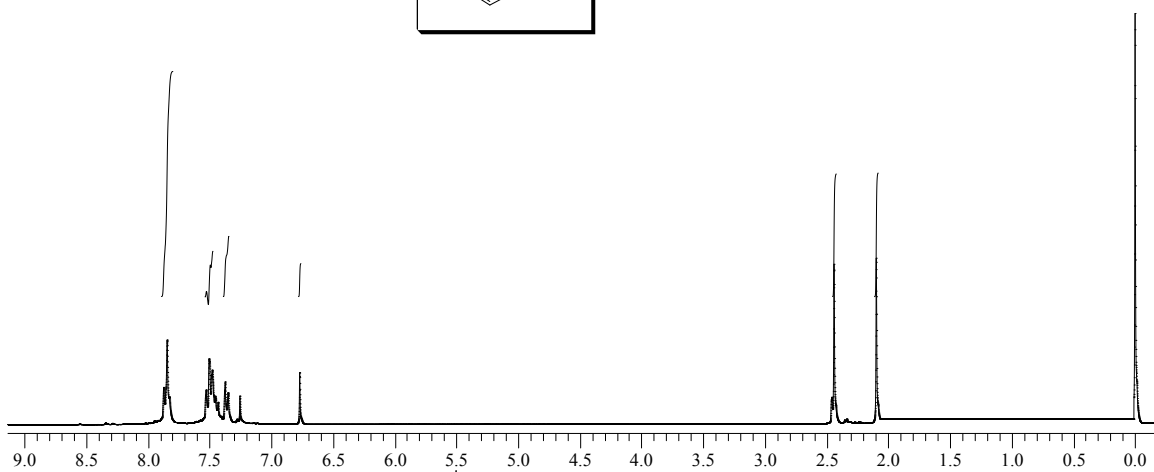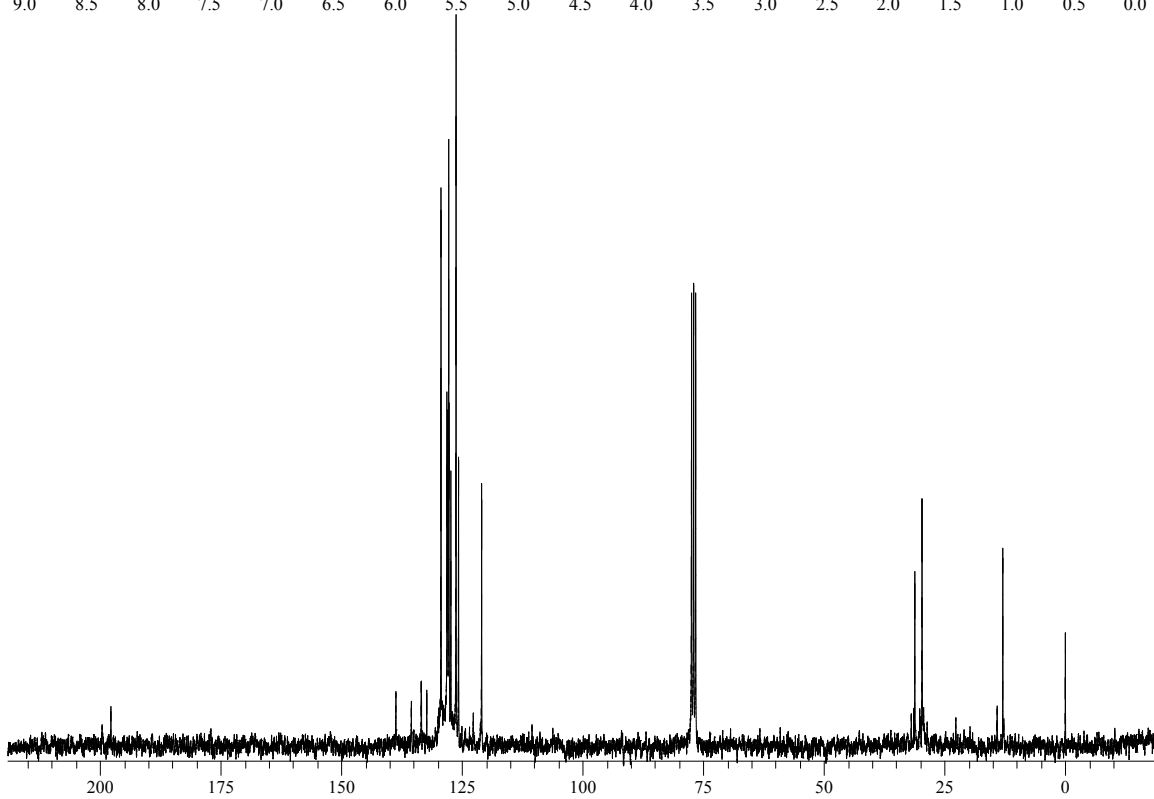

(Table 2, Entry 17)

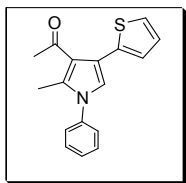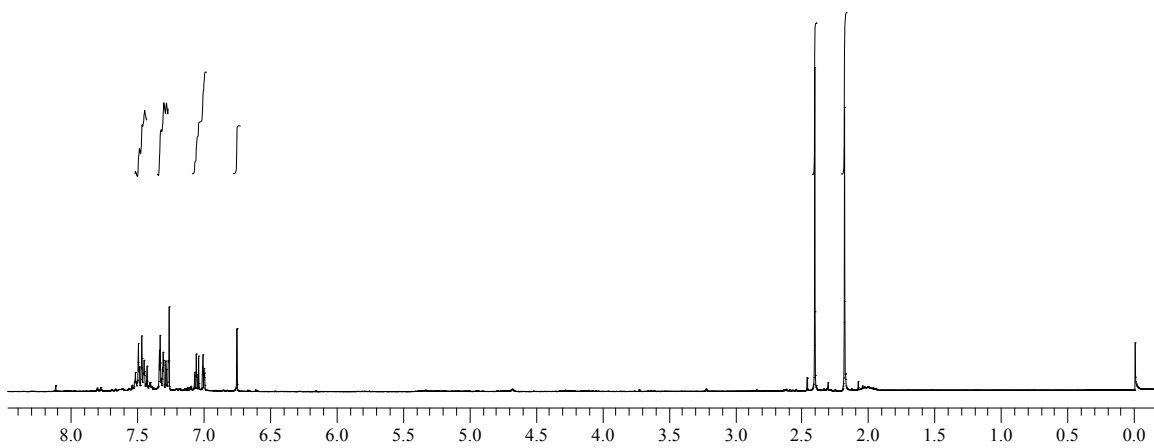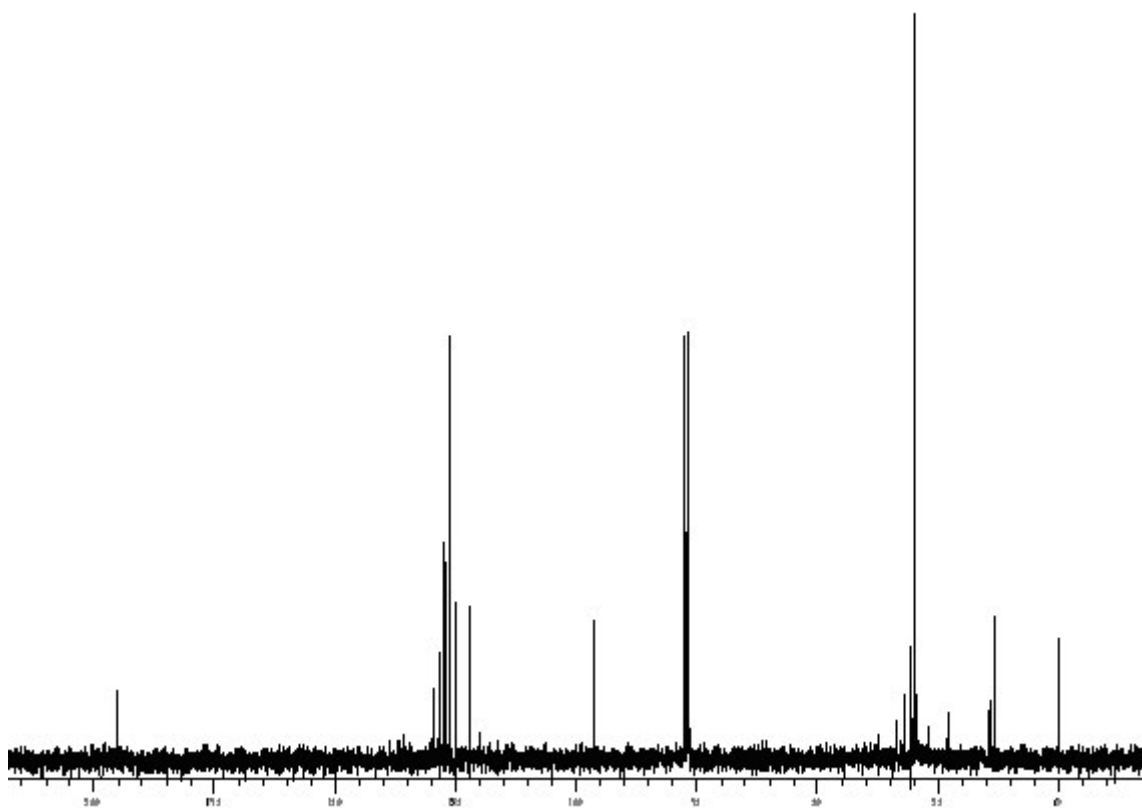

(Table 3, Entry 1)

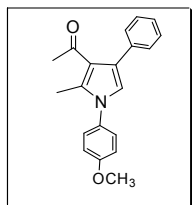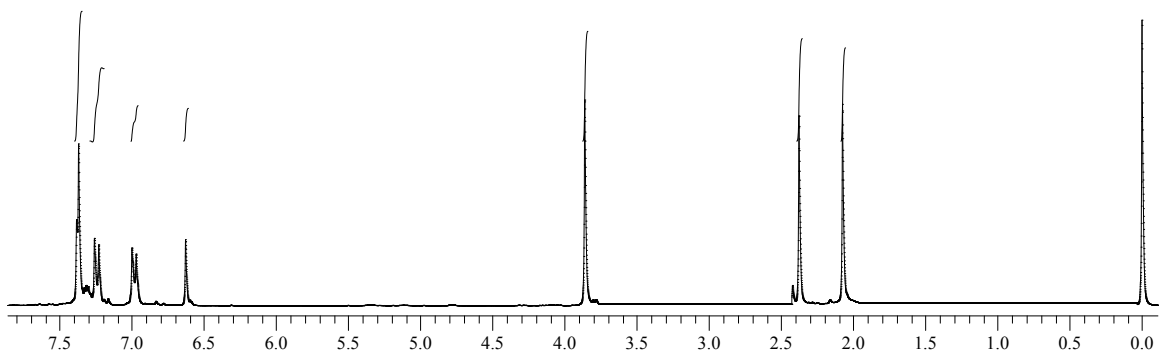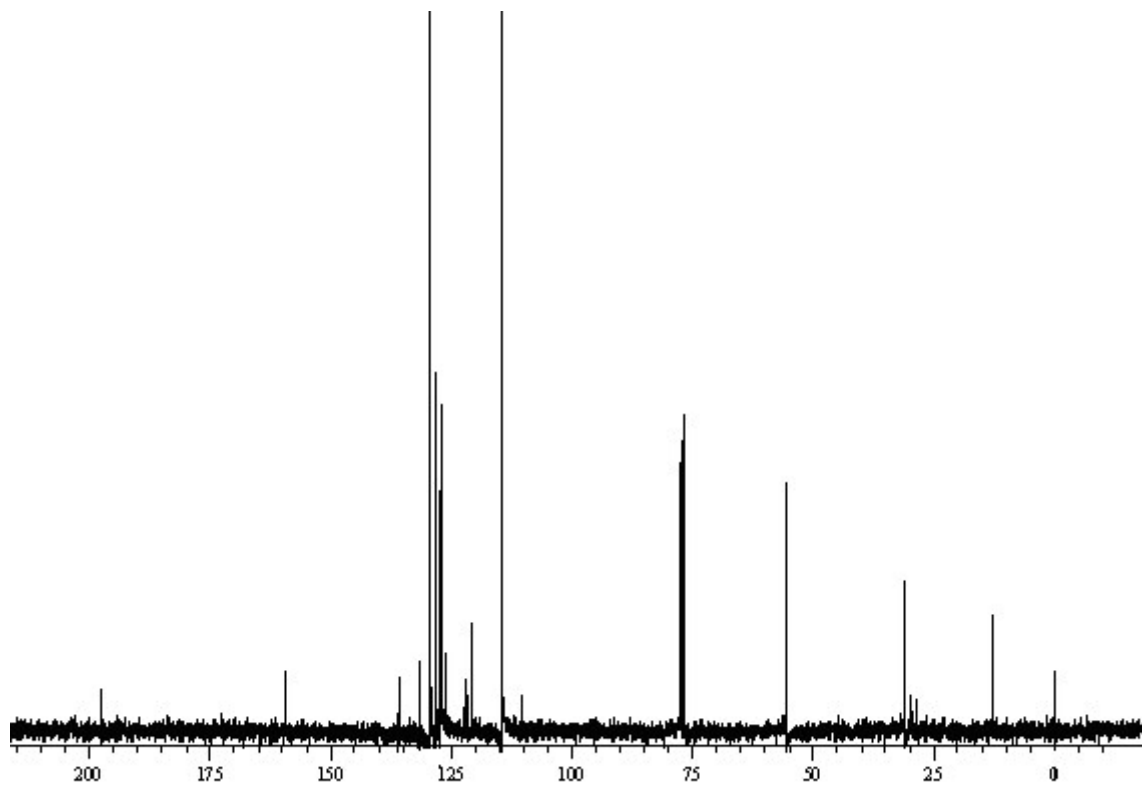

(Table 3, Entry 2)

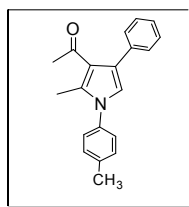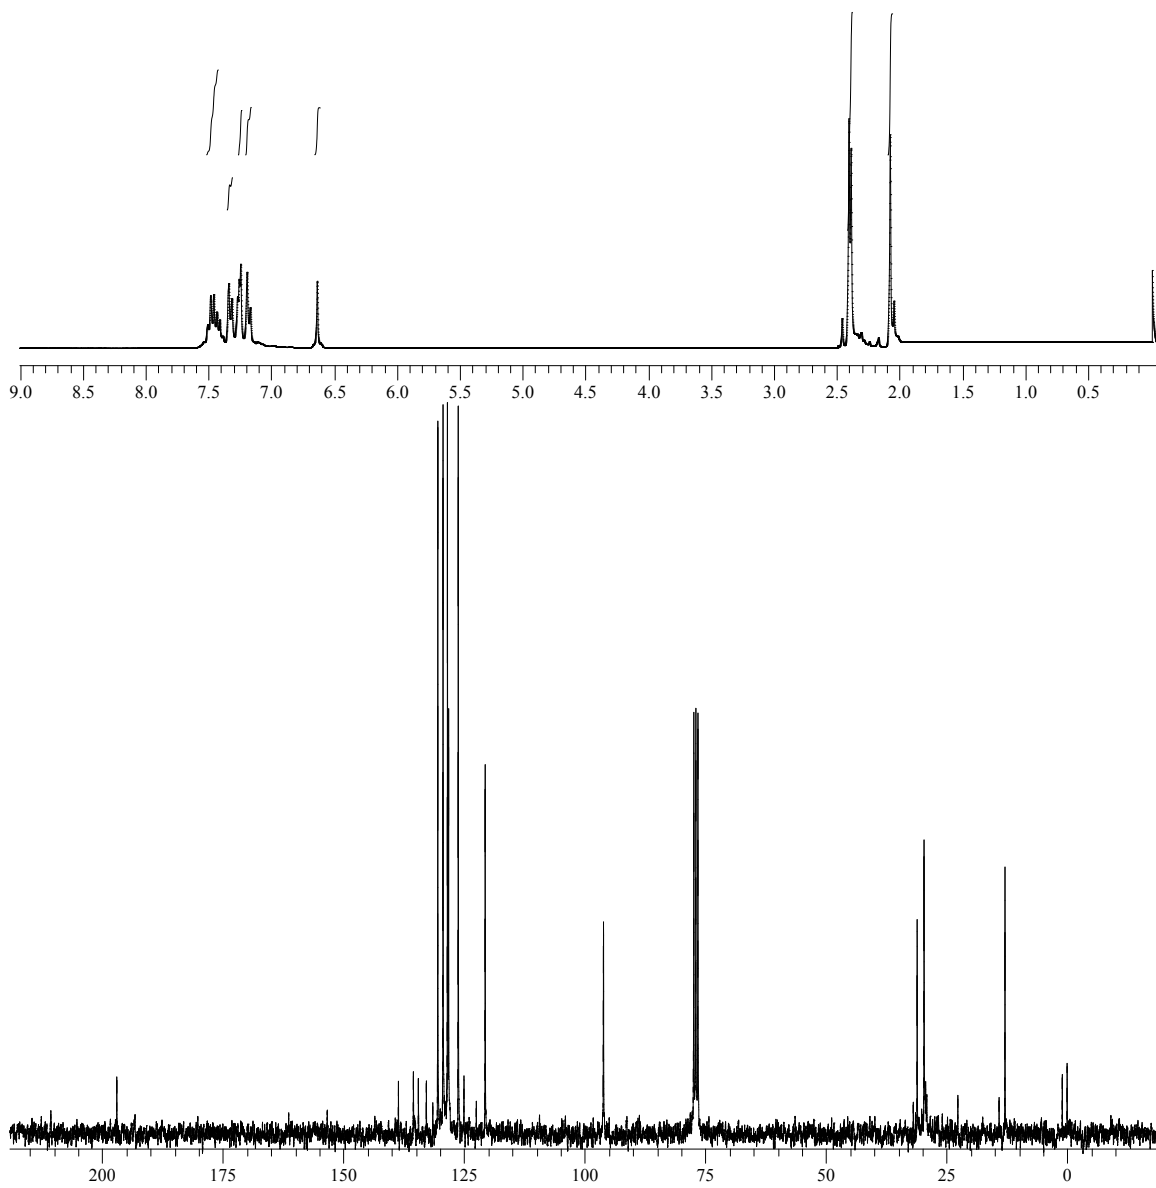

(Table 3, Entry 3)

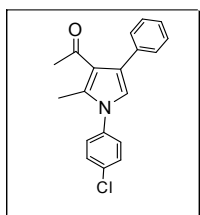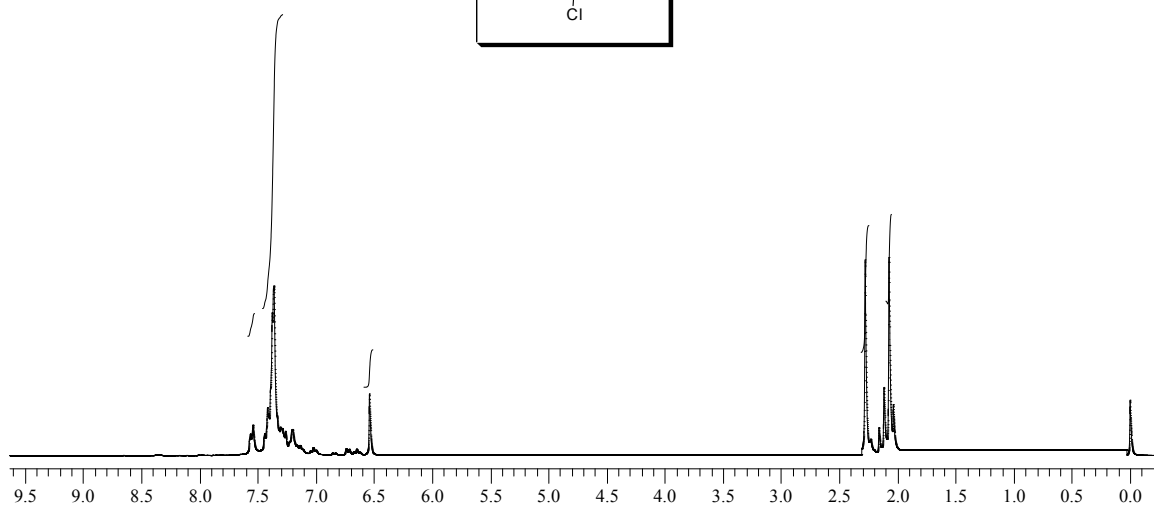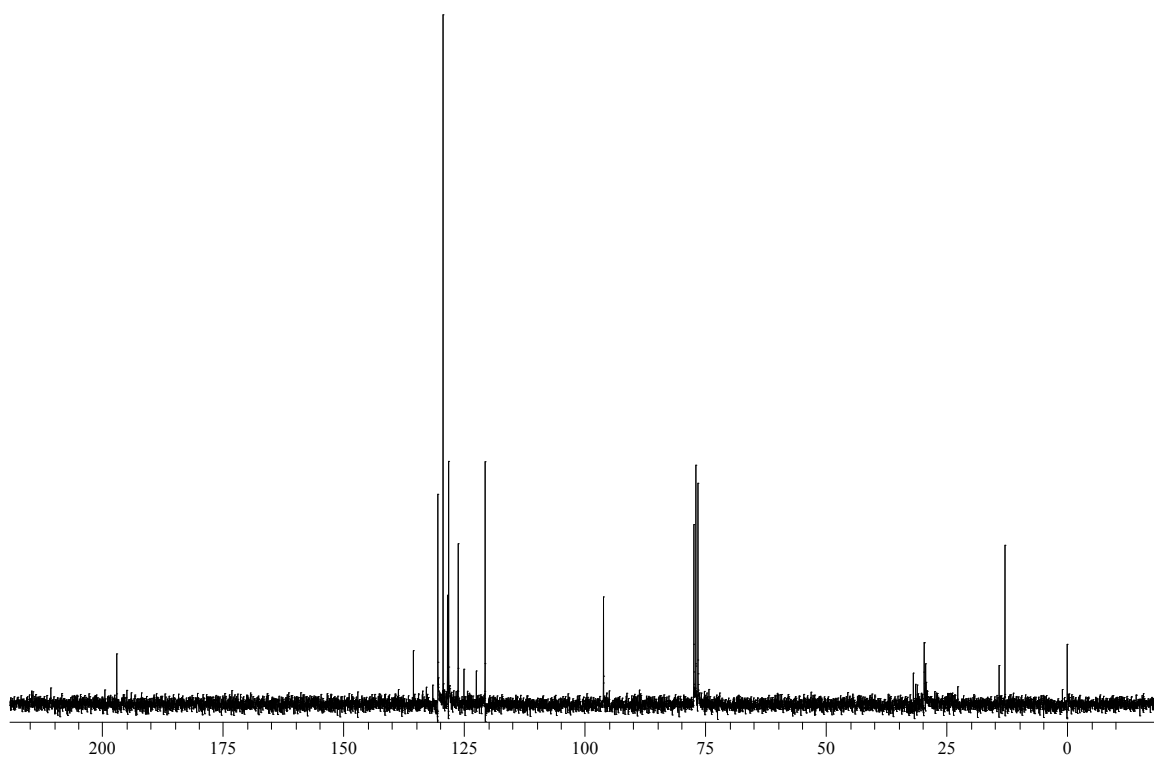

(Table 3, Entry 6)

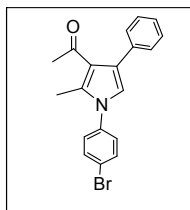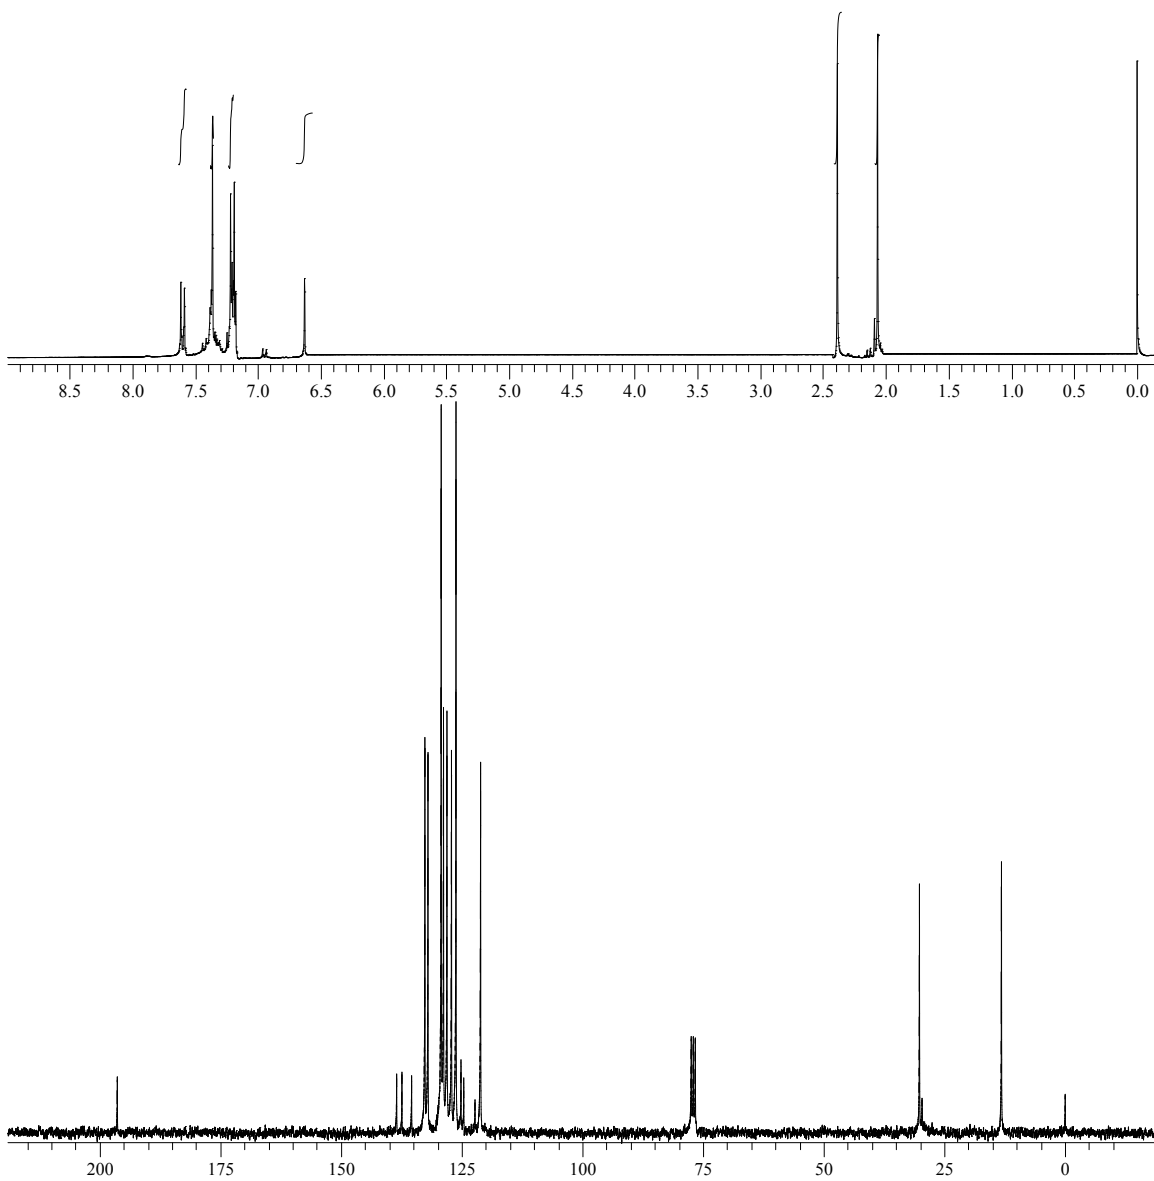

(Table 3, Entry 4)

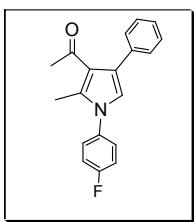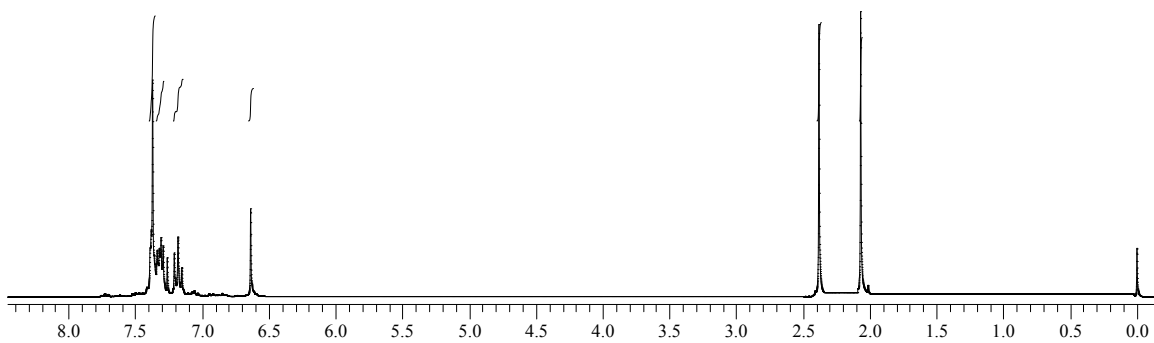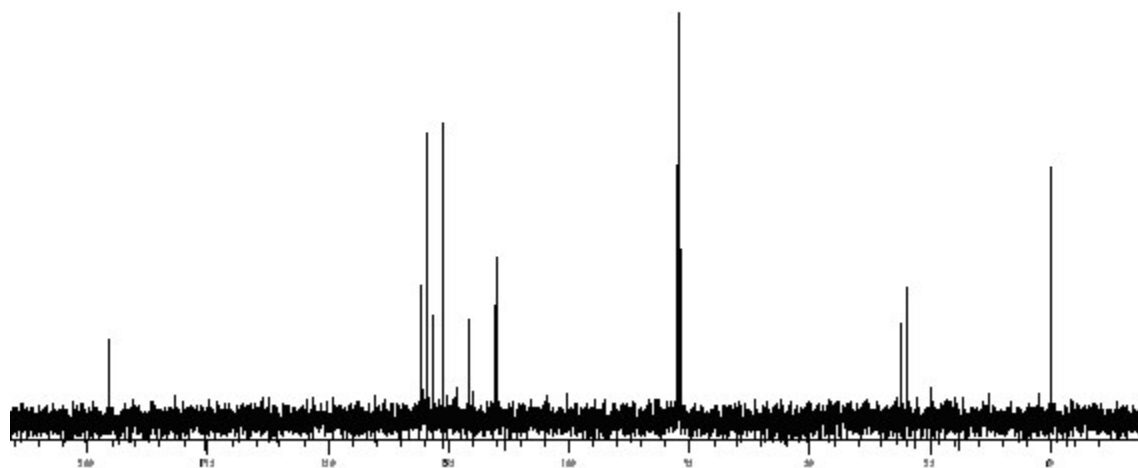

(Table 3, Entry 5)

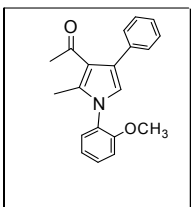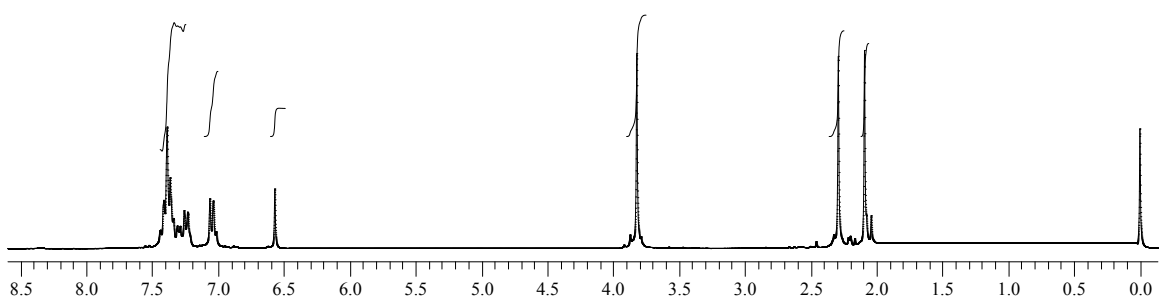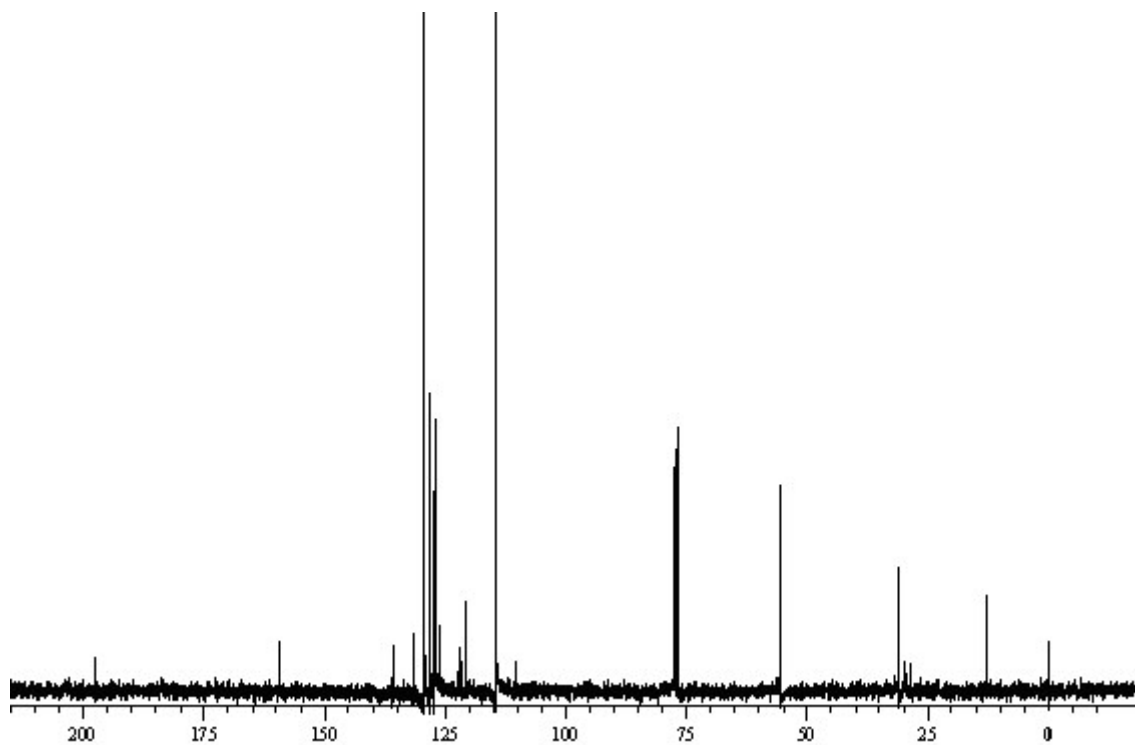



(Table 3, Entry 8)

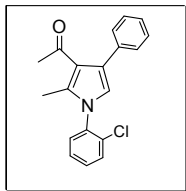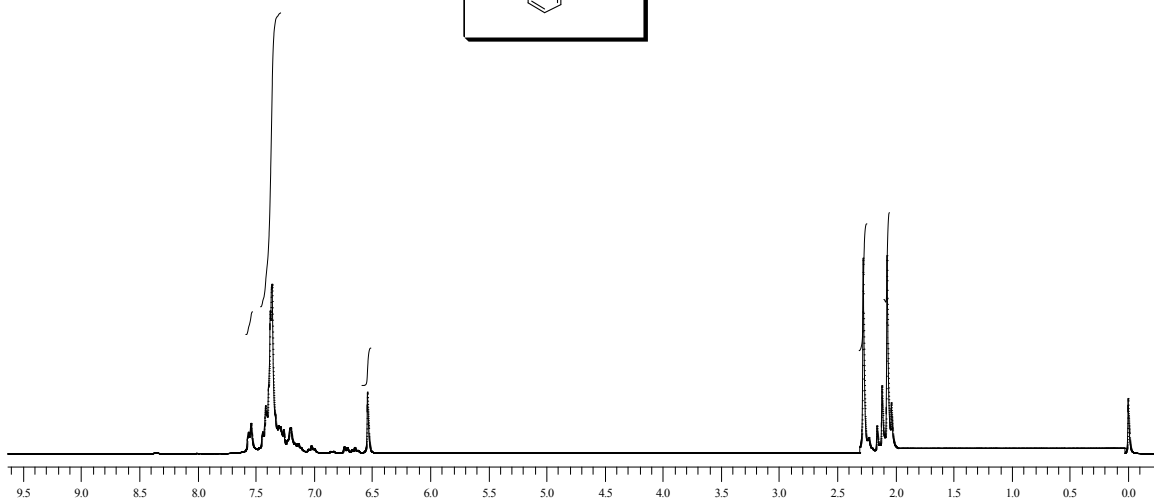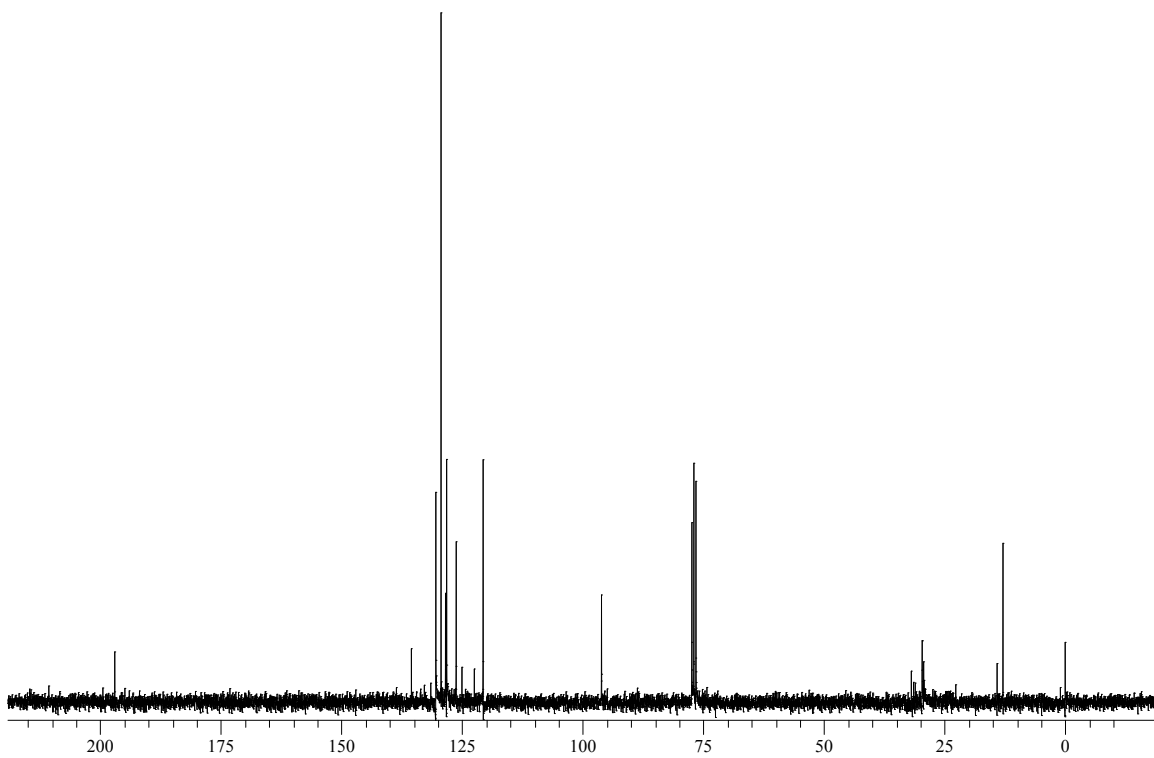

(Table 3, Entry 7)

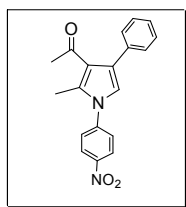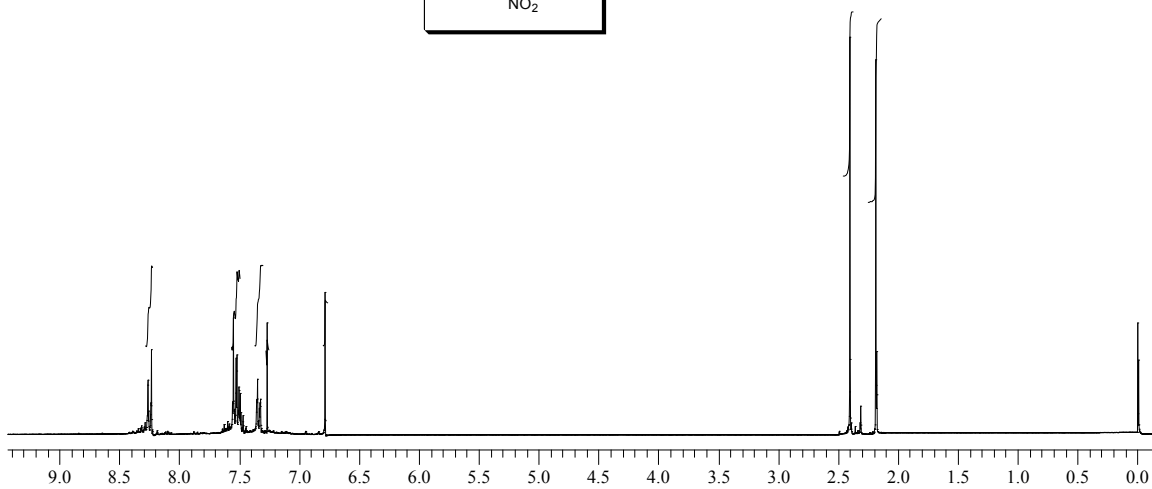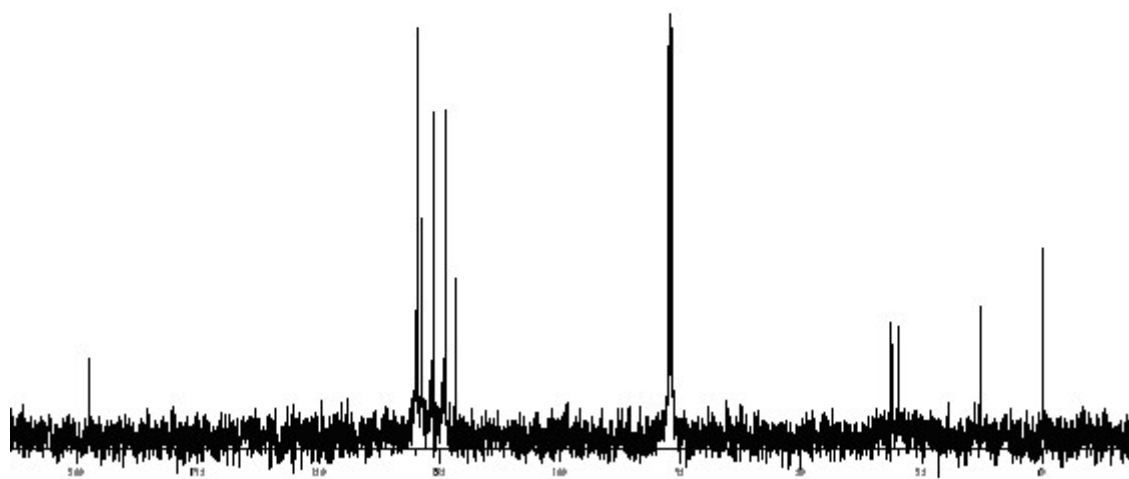

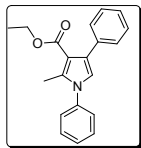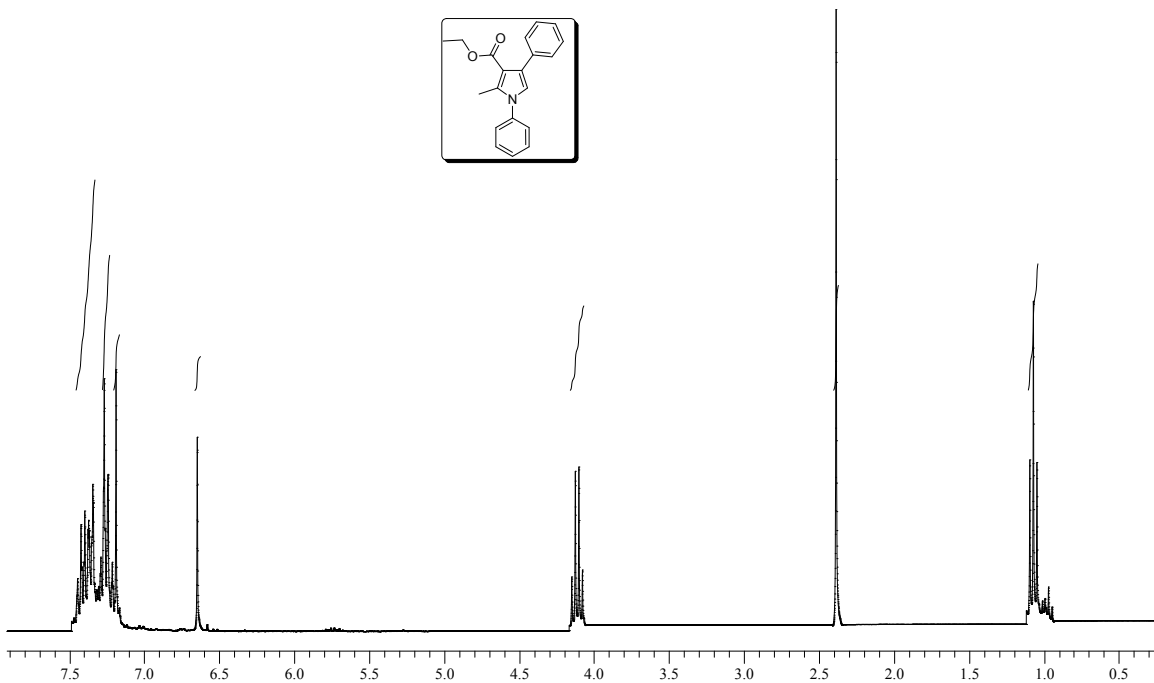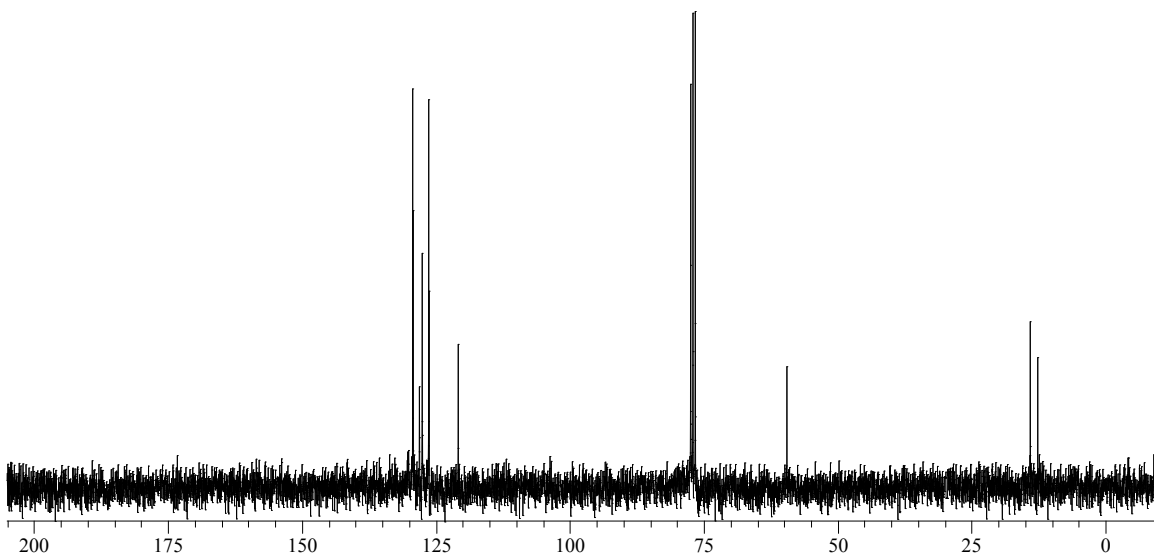

Supplement: c6ra08335h1.pdf [file c6ra08335h1.pdf]
